# Supplementary material for: Characterization of LC-MS Based Urine Metabolomics in Healthy Children and Adults
Source: Research Square preprint supplement (doi:10.21203/rs.3.rs-941914/v1), 2021-09-29
Supplement: Supplementary file 3 [file 8aa474812c0c191e5b793efc.docx]

Table S1 Detailed information of the identified metabolites

| Compound | Compound ID | Adducts | Formula | Score | Theoretical Isotope Distribution | Link | Description | Neutral mass (Da) | m/z | Charge | Retention time (min) |
| --- | --- | --- | --- | --- | --- | --- | --- | --- | --- | --- | --- |
| 5.36_263.1379m/z | HMDB0029118 | M+H-H2O | C14H20N2O4 | 50.3 | 100 - 16.3 - 2.06 - 0.192 | http://nonlinear.com/redirect/outbound?p=hmdb&param=HMDB0029118 | Tyrosyl-Valine |  | 263.1374137 | 1 | 5.1983 |
| 3.79_298.1135m/z | HMDB0005862 | M+H, M+K, M+Na | C11H15N5O5 | 43.2 | 100 - 14.1 - 1.95 - 0.182 | http://nonlinear.com/redirect/outbound?p=hmdb&param=HMDB0005862 | 2-Methylguanosine | 297.1055543 | 298.1128307 | 1 | 3.725966667 |
| 6.76_364.2235n | HMDB0000903 | M+H-H2O, M+H | C21H32O5 | 42.5 | 100 - 23.3 - 3.61 - 0.421 | http://nonlinear.com/redirect/outbound?p=hmdb&param=HMDB0000903 | Tetrahydrocortisone | 364.2227287 | 347.2194404 | 1 | 6.66555 |
| 5.41_130.0493m/z | HMDB0003339 | M+H-H2O | C5H9NO4 | 43 | 100 - 6.03 - 0.974 | http://nonlinear.com/redirect/outbound?p=hmdb&param=HMDB0003339 | D-Glutamic acid |  | 130.0490771 | 1 | 5.273966667 |
| 2.92_201.0451n | HMDB0034323 | M+Na | C6H11NO2S | 40.8 | 100 - 7.86 - 5.2 - 0.356 | http://nonlinear.com/redirect/outbound?p=hmdb&param=HMDB0034323 | S-Allylcysteine |  | 184.0417087 | 1 | 3.09755 |
| 5.41_146.0685n | HMDB0000641 | M+H-H2O, M+H | C5H10N2O3 | 41.6 | 100 - 6.37 - 0.789 | http://nonlinear.com/redirect/outbound?p=hmdb&param=HMDB0000641 | L-Glutamine | 146.0682527 | 129.0649644 | 1 | 5.273966667 |
| 5.24_265.1535m/z | HMDB0029008 | M+H | C14H20N2O3 | 38.5 | 100 - 16.2 - 1.85 - 0.158 | http://nonlinear.com/redirect/outbound?p=hmdb&param=HMDB0029008 | Phenylalanyl-Valine |  | 265.1531788 | 1 | 5.273966667 |
| 7.74_432.3089m/z | HMDB0000631 | M+Na, M+K, M+H-H2O | C26H43NO5 | 52.8 | 100 - 29.2 - 5.13 - 0.67 | http://nonlinear.com/redirect/outbound?p=hmdb&param=HMDB0000631 | Deoxycholic acid glycine conjugate | 449.3110984 | 432.308295 | 1 | 7.875966667 |
| 6.91_326.1948m/z | HMDB0061634 | M+Na | C15H29NO5 | 53.9 | 100 - 17.1 - 2.4 - 0.244 | http://nonlinear.com/redirect/outbound?p=hmdb&param=HMDB0061634 | 3-hydroxyoctanoyl carnitine |  | 326.1940844 | 1 | 6.865466667 |
| 7.21_314.2312m/z | HMDB0061636 | M+H-H2O | C17H33NO5 | 52.3 | 100 - 19.3 - 2.79 - 0.3 | http://nonlinear.com/redirect/outbound?p=hmdb&param=HMDB0061636 | 3-hydroxydecanoyl carnitine |  | 314.2306525 | 1 | 7.157616667 |
| 6.85_360.2727m/z | HMDB0040901 | M+NH4 | C19H34O5 | 50.4 | 100 - 21.1 - 3.15 - 0.351 | http://nonlinear.com/redirect/outbound?p=hmdb&param=HMDB0040901 | 13-Hydroxy-9-methoxy-10-oxo-11-octadecenoic acid |  | 360.2727329 | 1 | 7.4809 |
| 7.07_500.2827m/z | HMDB0010351 | M+NH4 | C25H38O9 | 50.3 | 100 - 27.8 - 5.57 - 0.833 - 0.104 | http://nonlinear.com/redirect/outbound?p=hmdb&param=HMDB0010351 | 11-beta-Hydroxyandrosterone-3-glucuronide |  | 500.2820994 | 1 | 6.969216667 |
| 6.90_239.1630m/z | HMDB0002059 | M+Na | C12H24O3 | 51.8 | 100 - 13.4 - 1.44 - 0.113 | http://nonlinear.com/redirect/outbound?p=hmdb&param=HMDB0002059 | 12-Hydroxydodecanoic acid |  | 239.1624305 | 1 | 6.817466667 |
| 4.70_377.1442m/z | HMDB0000244 | M+H, M+Na, M+K | C17H20N4O6 | 50.7 | 100 - 20.3 - 3.19 - 0.369 | http://nonlinear.com/redirect/outbound?p=hmdb&param=HMDB0000244 | Riboflavin | 376.1364343 | 377.1437108 | 1 | 5.251766667 |
| 5.42_264.1100n | HMDB0006344 | M+H, M+K, M+Na, M+H-H2O | C13H16N2O4 | 50.9 | 100 - 15.1 - 1.89 - 0.171 | http://nonlinear.com/redirect/outbound?p=hmdb&param=HMDB0006344 | Phenylacetylglutamine | 264.1093011 | 265.1165776 | 1 | 5.273966667 |
| 2.18_321.0682n | HMDB0013220 | M+Na, M+K, M+H, M+H-H2O | C11H15NO10 | 50.9 | 100 - 12.8 - 2.81 - 0.29 | http://nonlinear.com/redirect/outbound?p=hmdb&param=HMDB0013220 | Beta-Citryl-L-glutamic acid | 321.068233 | 322.075577 | 1 | 2.113566667 |
| 6.56_288.2157m/z | HMDB0000791 | M+H | C15H29NO4 | 50.8 | 100 - 17.1 - 2.19 - 0.209 | http://nonlinear.com/redirect/outbound?p=hmdb&param=HMDB0000791 | L-Octanoylcarnitine |  | 288.2153852 | 1 | 6.4766 |
| 6.77_321.1714m/z | HMDB0060473 | M+Na | C13H24N5O3+ | 48.9 | 100 - 16.3 - 1.86 - 0.16 | http://nonlinear.com/redirect/outbound?p=hmdb&param=HMDB0060473 | Diphthamide |  | 321.1759885 | 1 | 7.384466667 |
| 6.71_542.2701n | HMDB0010320 | M+NH4, M+Na, M+K | C27H42O11 | 49.6 | 100 - 30.1 - 6.63 - 1.09 - 0.149 | http://nonlinear.com/redirect/outbound?p=hmdb&param=HMDB0010320 | Cortolone-3-glucuronide | 542.2700968 | 560.3039223 | 1 | 6.631733333 |
| 2.99_220.0840n | HMDB0000472 | M+H, M+Na, M+K, M+H-H2O | C11H12N2O3 | 48.9 | 100 - 12.9 - 1.38 - 0.107 | http://nonlinear.com/redirect/outbound?p=hmdb&param=HMDB0000472 | 5-Hydroxy-L-tryptophan | 220.083497 | 221.0907734 | 1 | 2.8688 |
| 6.76_329.2097m/z | HMDB0000015 | M+H-H2O | C21H30O4 | 49.2 | 100 - 23.2 - 3.39 - 0.371 | http://nonlinear.com/redirect/outbound?p=hmdb&param=HMDB0000015 | Cortexolone |  | 329.2091716 | 1 | 6.66555 |
| 3.41_214.0944n | HMDB0028744 | M+H | C9H17N3O4 | 48.9 | 100 - 11.2 - 1.39 - 0.109 | http://nonlinear.com/redirect/outbound?p=hmdb&param=HMDB0028744 | Asparaginyl-Valine |  | 232.1277213 | 1 | 3.3298 |
| 3.68_254.1600m/z | HMDB0028717 | M+H-H2O | C11H21N5O3 | 50.4 | 100 - 14.1 - 1.54 - 0.124 | http://nonlinear.com/redirect/outbound?p=hmdb&param=HMDB0028717 | Arginyl-Proline |  | 254.159805 | 1 | 3.585566667 |
| 7.42_316.2470m/z | HMDB0000651 | M+H | C17H33NO4 | 50.1 | 100 - 19.3 - 2.58 - 0.259 | http://nonlinear.com/redirect/outbound?p=hmdb&param=HMDB0000651 | Decanoylcarnitine |  | 316.246707 | 1 | 7.3911 |
| 2.50_176.0939n | HMDB0004400 | M+H | C7H10N4O3 | 49 | 100 - 9.26 - 1 | http://nonlinear.com/redirect/outbound?p=hmdb&param=HMDB0004400 | 5-Acetylamino-6-amino-3-methyluracil |  | 199.0815268 | 1 | 2.5274 |
| 1.50_247.1389m/z | HMDB0028739 | M+NH4 | C9H15N3O4 | 48.7 | 100 - 11.2 - 1.39 - 0.109 | http://nonlinear.com/redirect/outbound?p=hmdb&param=HMDB0028739 | Asparaginyl-Proline |  | 247.138747 | 1 | 1.473766667 |
| 3.45_233.1123m/z | HMDB0028766 | M+H | C9H16N2O5 | 50 | 100 - 10.8 - 1.56 - 0.127 | http://nonlinear.com/redirect/outbound?p=hmdb&param=HMDB0028766 | Aspartyl-Valine |  | 233.112085 | 1 | 3.369216667 |
| 4.00_237.0860m/z | HMDB0060485 | M+H, M+Na | C11H12N2O4 | 49.5 | 100 - 12.9 - 1.59 - 0.134 | http://nonlinear.com/redirect/outbound?p=hmdb&param=HMDB0060485 | L-Formylkynurenine | 236.0785052 | 237.0857816 | 1 | 3.893983333 |
| 7.45_237.1475m/z | HMDB0010727 | M+Na | C12H22O3 | 49.8 | 100 - 13.3 - 1.44 - 0.113 | http://nonlinear.com/redirect/outbound?p=hmdb&param=HMDB0010727 | 3-Oxododecanoic acid |  | 237.1469565 | 1 | 7.350783333 |
| 5.84_428.2605n | HMDB0012936 | M+H | C20H39N5O6 | 47.8 | 100 - 24.1 - 4.03 - 0.503 | http://nonlinear.com/redirect/outbound?p=hmdb&param=HMDB0012936 | Dynorphin B (10-13) |  | 446.2940919 | 1 | 5.758066667 |
| 2.25_144.0648m/z | HMDB0061715 | M+H-H2O | C6H11NO4 | 49.2 | 100 - 7.13 - 1.04 | http://nonlinear.com/redirect/outbound?p=hmdb&param=HMDB0061715 | Glutamate, gamma-methyl ester |  | 144.0647182 | 1 | 3.477316667 |
| 6.28_206.0805m/z | HMDB0011621 | M+H, M+Na | C11H11NO3 | 48.7 | 100 - 12.5 - 1.33 - 0.102 | http://nonlinear.com/redirect/outbound?p=hmdb&param=HMDB0011621 | Cinnamoylglycine | 205.0725057 | 206.0797821 | 1 | 6.34805 |
| 1.90_240.1332m/z | HMDB0060442 | M+Na | C9H19N3O3 | 49 | 100 - 11.2 - 1.18 | http://nonlinear.com/redirect/outbound?p=hmdb&param=HMDB0060442 | beta-Alanyl-L-lysine |  | 240.1329647 | 1 | 1.832883333 |
| 3.74_229.0940n | HMDB0011172 | M+H | C10H18N2O5 | 48.9 | 100 - 11.9 - 1.68 - 0.144 | http://nonlinear.com/redirect/outbound?p=hmdb&param=HMDB0011172 | gamma-Glutamylvaline |  | 247.127421 | 1 | 3.643133333 |
| 4.94_167.0576n | HMDB0000978 | M+H-H2O | C10H9NO4 | 47.7 | 100 - 11.4 - 1.42 - 0.112 | http://nonlinear.com/redirect/outbound?p=hmdb&param=HMDB0000978 | 4-(2-Aminophenyl)-2,4-dioxobutanoic acid |  | 190.0488371 | 1 | 4.8423 |
| 7.14_465.2464m/z | HMDB0003193 | M+H | C25H36O8 | 48.1 | 100 - 27.8 - 5.35 - 0.773 | http://nonlinear.com/redirect/outbound?p=hmdb&param=HMDB0003193 | Testosterone glucuronide |  | 465.245534 | 1 | 7.038383333 |
| 4.20_383.1064n | HMDB0000912 | M+H, M+Na | C14H17N5O8 | 48.3 | 100 - 17.5 - 3.08 - 0.361 | http://nonlinear.com/redirect/outbound?p=hmdb&param=HMDB0000912 | Succinyladenosine | 383.1055494 | 384.1128259 | 1 | 4.1273 |
| 3.48_181.0595n | HMDB0006037 | M+H, M+Na | C6H7N5O2 | 48.3 | 100 - 8.47 - 0.731 | http://nonlinear.com/redirect/outbound?p=hmdb&param=HMDB0006037 | 8-Hydroxy-7-methylguanine | 181.0592801 | 182.0665565 | 1 | 3.354733333 |
| 2.45_258.1075m/z | HMDB0000982 | M+H | C10H15N3O5 | 47.1 | 100 - 12.3 - 1.72 - 0.15 | http://nonlinear.com/redirect/outbound?p=hmdb&param=HMDB0000982 | 5-Methylcytidine |  | 258.107147 | 1 | 1.518716667 |
| 4.75_187.0626n | HMDB0004096 | M+H-H2O | C11H11NO3 | 47 | 100 - 12.5 - 1.33 - 0.102 | http://nonlinear.com/redirect/outbound?p=hmdb&param=HMDB0004096 | 5-Methoxyindoleacetate |  | 188.0696324 | 1 | 4.636633333 |
| 5.24_115.0748m/z | HMDB0010718 | M+H-H2O | C6H12O3 | 48.3 | 100 - 6.74 - 0.809 | http://nonlinear.com/redirect/outbound?p=hmdb&param=HMDB0010718 | 3-Hydroxyhexanoic acid |  | 115.074702 | 1 | 5.1929 |
| 7.74_466.2548n | HMDB0010365 | M+NH4 | C25H38O8 | 48.5 | 100 - 27.8 - 5.36 - 0.774 | http://nonlinear.com/redirect/outbound?p=hmdb&param=HMDB0010365 | 3-alpha-hydroxy-5-alpha-androstane-17-one 3-D-glucuronide |  | 484.2882157 | 1 | 7.648716667 |
| 2.37_172.1072m/z | HMDB0000679 | M+H-H2O | C7H15N3O3 | 48.1 | 100 - 8.95 - 0.974 | http://nonlinear.com/redirect/outbound?p=hmdb&param=HMDB0000679 | Homocitrulline |  | 172.1071542 | 1 | 2.277583333 |
| 7.55_257.2255m/z | HMDB0005935 | M+H-H2O, M+H | C19H30O | 47.6 | 100 - 20.9 - 2.29 - 0.173 | http://nonlinear.com/redirect/outbound?p=hmdb&param=HMDB0005935 | Androstenol | 274.2281852 | 257.2248969 | 1 | 7.4658 |
| 4.67_120.0440m/z | HMDB0060722 | M+H-H2O | C7H7NO2 | 48 | 100 - 8.09 - 0.697 | http://nonlinear.com/redirect/outbound?p=hmdb&param=HMDB0060722 | 2-Pyridylacetic acid |  | 120.0439514 | 1 | 4.573466667 |
| 7.01_302.2313m/z | HMDB0006320 | M+H | C16H31NO4 | 47.8 | 100 - 18.2 - 2.38 - 0.233 | http://nonlinear.com/redirect/outbound?p=hmdb&param=HMDB0006320 | 2,6 Dimethylheptanoyl carnitine |  | 302.2307462 | 1 | 6.954466667 |
| 3.44_375.1134m/z | HMDB0001013 | M+Na | C16H20N2O7 | 46.1 | 100 - 18.5 - 3.06 - 0.355 | http://nonlinear.com/redirect/outbound?p=hmdb&param=HMDB0001013 | Cotinine glucuronide |  | 375.113167 | 1 | 3.341216667 |
| 3.79_228.1332m/z | HMDB0028810 | M+H-H2O | C10H19N3O4 | 47.7 | 100 - 12.3 - 1.52 - 0.125 | http://nonlinear.com/redirect/outbound?p=hmdb&param=HMDB0028810 | Glutaminylvaline |  | 228.1332622 | 1 | 3.703233333 |
| 5.24_195.0871m/z | HMDB0028843 | M+H-H2O | C8H12N4O3 | 47.2 | 100 - 10.4 - 1.1 | http://nonlinear.com/redirect/outbound?p=hmdb&param=HMDB0028843 | Glycyl-Histidine |  | 195.0863963 | 1 | 5.129233333 |
| 4.20_219.1098n | HMDB0000210 | M+H, M+Na, M+K, M+H-H2O | C9H17NO5 | 46.5 | 100 - 10.5 - 1.52 - 0.121 | http://nonlinear.com/redirect/outbound?p=hmdb&param=HMDB0000210 | Pantothenic acid | 219.1094158 | 220.1166922 | 1 | 4.1273 |
| 5.11_295.1137m/z | HMDB0029111 | M+H-H2O | C14H20N2O4S | 46.4 | 100 - 17.1 - 6.71 - 0.943 - 0.13 | http://nonlinear.com/redirect/outbound?p=hmdb&param=HMDB0029111 | Tyrosyl-Methionine |  | 295.1132133 | 1 | 5.0568 |
| 1.90_146.0805m/z | HMDB0032862 | M+H-H2O | C6H13NO4 | 47.7 | 100 - 7.16 - 1.04 | http://nonlinear.com/redirect/outbound?p=hmdb&param=HMDB0032862 | 2-Amino-4-ethoxy-3-hydroxybutanoic acid |  | 146.0805426 | 1 | 1.835566667 |
| 2.25_304.0894n | HMDB0001067 | M+H, M+Na | C11H16N2O8 | 47.4 | 100 - 13.1 - 2.44 - 0.244 | http://nonlinear.com/redirect/outbound?p=hmdb&param=HMDB0001067 | N-Acetylaspartylglutamic acid | 304.0892119 | 305.0964883 | 1 | 2.184716667 |
| 5.71_244.1414n | HMDB0028908 | M+H, M+K | C11H20N2O4 | 47.8 | 100 - 13 - 1.6 - 0.135 | http://nonlinear.com/redirect/outbound?p=hmdb&param=HMDB0028908 | Isoleucyl-Hydroxyproline | 244.1408915 | 245.1481679 | 1 | 5.624466667 |
| 5.55_342.1896m/z | HMDB0000600 | M+NH4 | C12H24N2O8 | 40.7 | 100 - 14.3 - 2.59 - 0.273 | http://nonlinear.com/redirect/outbound?p=hmdb&param=HMDB0000600 | Galactosylhydroxylysine |  | 342.1889143 | 1 | 5.4573 |
| 2.77_250.1155n | HMDB0029062 | M+H | C9H16N2O5 | 47.2 | 100 - 10.8 - 1.56 - 0.127 | http://nonlinear.com/redirect/outbound?p=hmdb&param=HMDB0029062 | Threoninyl-Hydroxyproline |  | 233.1118867 | 1 | 2.612983333 |
| 5.10_346.2212m/z | HMDB0061062 | M+NH4 | C18H24N4O2 | 45.7 | 100 - 21.3 - 2.57 - 0.226 | http://nonlinear.com/redirect/outbound?p=hmdb&param=HMDB0061062 | 7-hydroxygranisetron |  | 346.2207509 | 1 | 5.0186 |
| 4.30_213.0974m/z | HMDB0004369 | M+H-H2O, M+Na | C11H14N2O | 46.3 | 100 - 12.8 - 0.962 | http://nonlinear.com/redirect/outbound?p=hmdb&param=HMDB0004369 | N-Methylserotonin | 190.1096229 | 213.0969441 | 1 | 4.175066667 |
| 5.49_302.1481m/z | HMDB0028821 | M+H, M+NH4 | C11H16N4O5 | 47.4 | 100 - 13.7 - 1.9 - 0.175 | http://nonlinear.com/redirect/outbound?p=hmdb&param=HMDB0028821 | Glutamylhistidine | 284.1143792 | 302.1480417 | 1 | 5.394733333 |
| 6.34_244.0838n | HMDB0006005 | M+H, M+Na, M+K | C13H12N2O3 | 47.2 | 100 - 15 - 1.67 - 0.138 | http://nonlinear.com/redirect/outbound?p=hmdb&param=HMDB0006005 | Indolylacryloylglycine | 244.0832821 | 245.0905585 | 1 | 6.240466667 |
| 3.53_212.0906m/z | HMDB0011754 | M+H | C10H13NO4 | 46.1 | 100 - 11.5 - 1.42 - 0.113 | http://nonlinear.com/redirect/outbound?p=hmdb&param=HMDB0011754 | Methyldopa |  | 212.0899543 | 1 | 3.457466667 |
| 1.51_286.1384m/z | HMDB0002171 | M+H, M+Na, M+K | C12H19N3O5 | 46.4 | 100 - 14.5 - 2 - 0.189 | http://nonlinear.com/redirect/outbound?p=hmdb&param=HMDB0002171 | Glycylprolylhydroxyproline | 285.1309238 | 286.1382002 | 1 | 1.254916667 |
| 2.53_215.1018m/z | HMDB0000609 | M+NH4 | C9H11NO4 | 46.2 | 100 - 10.4 - 1.31 | http://nonlinear.com/redirect/outbound?p=hmdb&param=HMDB0000609 | Dopa |  | 215.1015884 | 1 | 3.27855 |
| 3.58_180.0873m/z | HMDB0011690 | M+H | C7H9N5O | 46.3 | 100 - 9.54 - 0.616 | http://nonlinear.com/redirect/outbound?p=hmdb&param=HMDB0011690 | 7-Aminomethyl-7-carbaguanine |  | 180.0872013 | 1 | 4.111216667 |
| 2.14_385.1274m/z | HMDB0000939 | M+H, M+Na | C14H20N6O5S | 46.1 | 100 - 18.6 - 7.18 - 1.08 - 0.159 | http://nonlinear.com/redirect/outbound?p=hmdb&param=HMDB0000939 | S-Adenosylhomocysteine | 384.1198139 | 385.1270903 | 1 | 2.08465 |
| 7.21_584.3166n | HMDB0002577 | M+NH4, M+Na, M+H | C30H48O11 | 46.2 | 100 - 33.4 - 7.67 - 1.32 - 0.188 | http://nonlinear.com/redirect/outbound?p=hmdb&param=HMDB0002577 | Cholic acid glucuronide | 584.3157473 | 602.3495728 | 1 | 6.540633333 |
| 5.25_217.0962m/z | HMDB0002339 | M+H-H2O | C12H14N2O3 | 46.7 | 100 - 14 - 1.52 - 0.122 | http://nonlinear.com/redirect/outbound?p=hmdb&param=HMDB0002339 | 5-Methoxytryptophan |  | 217.0960305 | 1 | 5.148433333 |
| 5.76_194.0803m/z | HMDB0001434 | M+H-H2O | C10H13NO4 | 46.5 | 100 - 11.5 - 1.42 - 0.113 | http://nonlinear.com/redirect/outbound?p=hmdb&param=HMDB0001434 | 3-Methoxytyrosine |  | 194.0802285 | 1 | 5.69105 |
| 7.02_382.2569m/z | HMDB0061638 | M+Na | C19H37NO5 | 47.3 | 100 - 21.5 - 3.23 - 0.364 | http://nonlinear.com/redirect/outbound?p=hmdb&param=HMDB0061638 | 3-hydroxydodecanoyl carnitine |  | 382.256694 | 1 | 7.36565 |
| 2.35_152.0561m/z | HMDB0000132 | M+H | C5H5N5O | 45.9 | 100 - 7.33 - 0.442 | http://nonlinear.com/redirect/outbound?p=hmdb&param=HMDB0000132 | Guanine |  | 152.0557893 | 1 | 2.26925 |
| 3.14_216.1102n | HMDB0029069 | M+H, M+Na | C9H16N2O4 | 45.7 | 100 - 10.8 - 1.35 - 0.104 | http://nonlinear.com/redirect/outbound?p=hmdb&param=HMDB0029069 | Threoninyl-Proline | 216.1100436 | 217.11732 | 1 | 3.598716667 |
| 3.87_316.1314m/z | HMDB0028830 | M+H-H2O | C16H19N3O5 | 45.4 | 100 - 18.8 - 2.7 - 0.286 | http://nonlinear.com/redirect/outbound?p=hmdb&param=HMDB0028830 | Glutamyltryptophan |  | 316.1310459 | 1 | 3.595583333 |
| 4.70_300.1312n | HMDB0003950 | M+H, M+NH4 | C11H15N4O5+ | 47.2 | 100 - 13.7 - 1.9 - 0.175 | http://nonlinear.com/redirect/outbound?p=hmdb&param=HMDB0003950 | 7-Methylinosine | 283.1043509 | 301.1385593 | 1 | 4.557916667 |
| 4.70_304.1742m/z | HMDB0028716 | M+H-H2O | C15H23N5O3 | 44.9 | 100 - 18.4 - 2.22 - 0.202 | http://nonlinear.com/redirect/outbound?p=hmdb&param=HMDB0028716 | Arginyl-Phenylalanine |  | 304.1736003 | 1 | 4.636633333 |
| 6.56_507.2572m/z | HMDB0010364 | M+H-H2O, M+H | C27H38O9 | 40 | 100 - 30 - 6.19 - 0.957 - 0.122 | http://nonlinear.com/redirect/outbound?p=hmdb&param=HMDB0010364 | 11-Hydroxyprogesterone 11-glucuronide | 506.2480611 | 507.2556238 | 1 | 6.4828 |
| 3.63_204.0647m/z | HMDB0006050 | M+Na | C9H11NO3 | 46.4 | 100 - 10.3 - 1.1 | http://nonlinear.com/redirect/outbound?p=hmdb&param=HMDB0006050 | o-Tyrosine |  | 204.0644188 | 1 | 3.50515 |
| 6.10_291.0962m/z | HMDB0029114 | M+Na | C12H16N2O5 | 43.7 | 100 - 14.1 - 1.95 - 0.181 | http://nonlinear.com/redirect/outbound?p=hmdb&param=HMDB0029114 | Tyrosyl-Serine |  | 291.0958127 | 1 | 5.9808 |
| 5.45_340.1740m/z | HMDB0033105 | M+NH4 | C12H22N2O8 | 45.9 | 100 - 14.3 - 2.59 - 0.273 | http://nonlinear.com/redirect/outbound?p=hmdb&param=HMDB0033105 | N2-Galacturonyl-L-lysine |  | 340.1737746 | 1 | 5.401333333 |
| 6.69_300.2156m/z | HMDB0061635 | M+H-H2O | C16H31NO5 | 46.2 | 100 - 18.2 - 2.59 - 0.271 | http://nonlinear.com/redirect/outbound?p=hmdb&param=HMDB0061635 | 3-hydroxynonanoyl carnitine |  | 300.2151167 | 1 | 6.620133333 |
| 6.41_247.1066m/z | HMDB0013713 | M+H | C13H14N2O3 | 45.7 | 100 - 15.1 - 1.67 - 0.139 | http://nonlinear.com/redirect/outbound?p=hmdb&param=HMDB0013713 | N-acetyltryptophan |  | 247.1064306 | 1 | 6.296666667 |
| 4.36_195.0886n | HMDB0029128 | M+H-H2O | C10H18N2O4 | 45.5 | 100 - 11.9 - 1.47 - 0.119 | http://nonlinear.com/redirect/outbound?p=hmdb&param=HMDB0029128 | Valyl-Hydroxyproline |  | 213.122057 | 1 | 4.2533 |
| 6.60_300.1745n | HMDB0060088 | M+NH4, M+K | C19H24O3 | 45.9 | 100 - 20.9 - 2.7 - 0.259 | http://nonlinear.com/redirect/outbound?p=hmdb&param=HMDB0060088 | 4-Methoxyestrone | 300.1737299 | 318.2075554 | 1 | 6.53765 |
| 4.23_311.1220n | HMDB0004824 | M+H, M+K, M+Na | C12H17N5O5 | 46.5 | 100 - 15.2 - 2.11 - 0.203 | http://nonlinear.com/redirect/outbound?p=hmdb&param=HMDB0004824 | N2,N2-Dimethylguanosine | 311.1213353 | 312.1286117 | 1 | 4.113566667 |
| 6.10_454.1816n | HMDB0062445 | M+NH4, M+Na, M+K | C22H30O10 | 44.9 | 100 - 24.5 - 4.93 - 0.718 | http://nonlinear.com/redirect/outbound?p=hmdb&param=HMDB0062445 | alpha-CEHC glucuronide | 454.1810615 | 472.214887 | 1 | 6.4828 |
| 3.89_267.1324m/z | HMDB0028930 | M+Na | C11H20N2O4 | 46.4 | 100 - 13 - 1.6 - 0.135 | http://nonlinear.com/redirect/outbound?p=hmdb&param=HMDB0028930 | Leucyl-Hydroxyproline |  | 267.1321542 | 1 | 3.77625 |
| 5.56_251.0783n | HMDB0059747 | M+H, M+Na | C12H13NO5 | 45.8 | 100 - 13.7 - 1.89 - 0.174 | http://nonlinear.com/redirect/outbound?p=hmdb&param=HMDB0059747 | 4-Hydroxy-3-methoxy-cinnamoylglycine | 251.0782525 | 252.0855289 | 1 | 5.487216667 |
| 5.76_399.1633m/z | HMDB0000768 | M+NH4 | C14H23NO11 | 45.2 | 100 - 16.2 - 3.49 - 0.423 | http://nonlinear.com/redirect/outbound?p=hmdb&param=HMDB0000768 | N-Acetyl-9-O-lactoylneuraminic acid |  | 399.1641706 | 1 | 6.005266667 |
| 4.50_187.0837n | HMDB0000669 | M+NH4 | C8H8O3 | 45.6 | 100 - 8.86 - 0.962 | http://nonlinear.com/redirect/outbound?p=hmdb&param=HMDB0000669 | Ortho-Hydroxyphenylacetic acid |  | 170.0802781 | 1 | 4.382833333 |
| 6.14_426.1508n | HMDB0003556 | M+NH4, M+K, M+Na | C15H26N2O12 | 46.1 | 100 - 17.7 - 3.95 - 0.513 | http://nonlinear.com/redirect/outbound?p=hmdb&param=HMDB0003556 | Chitobiose | 426.1501429 | 444.1839685 | 1 | 6.0578 |
| 8.06_490.2755n | HMDB0060120 | M+H-H2O, M+H, M+Na, M+NH4 | C24H42O10 | 45.6 | 100 - 26.8 - 5.51 - 0.835 - 0.107 | http://nonlinear.com/redirect/outbound?p=hmdb&param=HMDB0060120 | 10-Hydroxy-octadec-12Z-enoate-9-beta-D-glucuronide | 490.2747329 | 508.3085004 | 1 | 7.96945 |
| 6.76_540.2546n | HMDB0010357 | M+H, M+NH4, M+K, M+Na | C27H40O11 | 41 | 100 - 30.1 - 6.63 - 1.09 - 0.149 | http://nonlinear.com/redirect/outbound?p=hmdb&param=HMDB0010357 | Tetrahydroaldosterone-3-glucuronide | 540.2539011 | 541.2611775 | 1 | 6.66555 |
| 7.59_448.3039m/z | HMDB0000331 | M+H-H2O, M+H | C26H43NO6 | 44.8 | 100 - 29.2 - 5.35 - 0.731 | http://nonlinear.com/redirect/outbound?p=hmdb&param=HMDB0000331 | 3a,7b,12a-Trihydroxyoxocholanyl-Glycine | 465.3062486 | 448.3029603 | 1 | 7.4928 |
| 8.03_319.2036m/z | HMDB0060099 | M+H-H2O | C20H32O4 | 44.9 | 100 - 22.2 - 3.16 - 0.338 | http://nonlinear.com/redirect/outbound?p=hmdb&param=HMDB0060099 | 11-peroxy-eicosatetraenoate |  | 319.2250958 | 1 | 8.012716667 |
| 5.01_180.0529n | HMDB0041912 | M+H, M+Na | C8H8N2O3 | 44.6 | 100 - 9.59 - 1.03 | http://nonlinear.com/redirect/outbound?p=hmdb&param=HMDB0041912 | Isonicotinylglycine | 180.0525982 | 181.0598746 | 1 | 4.9153 |
| 0.92_170.0920m/z | HMDB0000001 | M+H | C7H11N3O2 | 45.2 | 100 - 8.87 - 0.761 | http://nonlinear.com/redirect/outbound?p=hmdb&param=HMDB0000001 | 1-Methylhistidine |  | 170.0914615 | 1 | 0.83245 |
| 5.12_143.0729n | HMDB0003447 | M+H-H2O | C10H11NO | 45.3 | 100 - 11.3 - 0.79 | http://nonlinear.com/redirect/outbound?p=hmdb&param=HMDB0003447 | Tryptophanol |  | 144.0801216 | 1 | 4.636633333 |
| 7.12_236.1270m/z | HMDB0094807 | M+Na | C11H19NO3 | 43.6 | 100 - 12.6 - 1.34 - 0.103 | http://nonlinear.com/redirect/outbound?p=hmdb&param=HMDB0094807 | 2-nonenoylglycine |  | 236.1270114 | 1 | 7.227233333 |
| 1.95_170.0804m/z | HMDB0004815 | M+NH4 | C8H8O3 | 45.6 | 100 - 8.86 - 0.962 | http://nonlinear.com/redirect/outbound?p=hmdb&param=HMDB0004815 | 4-Hydroxy-3-methylbenzoic acid |  | 170.0803716 | 1 | 1.905233333 |
| 1.50_273.1070m/z | HMDB0012267 | M+H-H2O | C11H18N2O7 | 35.3 | 100 - 13.1 - 2.23 - 0.217 | http://nonlinear.com/redirect/outbound?p=hmdb&param=HMDB0012267 | N-Succinyl-L,L-2,6-diaminopimelate |  | 273.106658 | 1 | 2.36675 |
| 5.10_261.1225m/z | HMDB0011176 | M+H-H2O | C14H18N2O4 | 45.8 | 100 - 16.2 - 2.06 - 0.191 | http://nonlinear.com/redirect/outbound?p=hmdb&param=HMDB0011176 | L-phenylalanyl-L-hydroxyproline |  | 261.1221374 | 1 | 4.985133333 |
| 2.08_223.0197m/z | HMDB0000192 | M+H-H2O | C6H12N2O4S2 | 42.8 | 100 - 9.11 - 10.2 - 0.835 - 0.354 | http://nonlinear.com/redirect/outbound?p=hmdb&param=HMDB0000192 | L-Cystine |  | 223.019252 | 1 | 2.024633333 |
| 7.04_288.2029m/z | HMDB0028712 | M+H | C12H25N5O3 | 44 | 100 - 15.2 - 1.7 - 0.141 | http://nonlinear.com/redirect/outbound?p=hmdb&param=HMDB0028712 | Arginyl-Isoleucine |  | 288.20141 | 1 | 6.775883333 |
| 3.14_153.0654m/z | HMDB0004193 | M+H | C7H8N2O2 | 45.5 | 100 - 8.47 - 0.727 | http://nonlinear.com/redirect/outbound?p=hmdb&param=HMDB0004193 | N1-Methyl-2-pyridone-5-carboxamide |  | 153.0651086 | 1 | 3.0083 |
| 4.28_180.0638n | HMDB0059771 | M+H-H2O | C7H10N4O3 | 44.5 | 100 - 9.26 - 1 | http://nonlinear.com/redirect/outbound?p=hmdb&param=HMDB0059771 | 6-amino-5[N-methylformylamino]-1-methyluracil |  | 181.0711852 | 1 | 4.538333333 |
| 2.73_185.0915m/z | HMDB0029047 | M+H-H2O | C8H14N2O4 | 45 | 100 - 9.7 - 1.24 | http://nonlinear.com/redirect/outbound?p=hmdb&param=HMDB0029047 | Serylproline |  | 185.0911564 | 1 | 2.630216667 |
| 1.54_169.0352m/z | HMDB0000289 | M+H | C5H4N4O3 | 44.6 | 100 - 7.03 - 0.832 | http://nonlinear.com/redirect/outbound?p=hmdb&param=HMDB0000289 | Uric acid |  | 169.0349145 | 1 | 1.516566667 |
| 3.93_211.0705m/z | HMDB0000012 | M+H-H2O | C9H12N2O5 | 44.3 | 100 - 10.8 - 1.56 - 0.126 | http://nonlinear.com/redirect/outbound?p=hmdb&param=HMDB0000012 | Deoxyuridine |  | 211.0700897 | 1 | 3.81775 |
| 4.28_285.1256m/z | HMDB0028976 | M+Na | C11H22N2O3S | 45.1 | 100 - 13.8 - 6.02 - 0.707 | http://nonlinear.com/redirect/outbound?p=hmdb&param=HMDB0028976 | Methionyl-Isoleucine |  | 285.1249198 | 1 | 4.188633333 |
| 7.01_312.2287n | HMDB0112190 | M+Na | C16H32O3 | 45.7 | 100 - 17.8 - 2.1 - 0.187 | http://nonlinear.com/redirect/outbound?p=hmdb&param=HMDB0112190 | 12-Hydroxyhexadecanoic acid |  | 295.2252143 | 1 | 7.670266667 |
| 2.14_177.1017m/z | HMDB0001046 | M+H | C10H12N2O | 43.6 | 100 - 11.7 - 0.833 | http://nonlinear.com/redirect/outbound?p=hmdb&param=HMDB0001046 | Cotinine |  | 177.1012793 | 1 | 2.053466667 |
| 4.66_298.0957m/z | HMDB0001173 | M+H | C11H15N5O3S | 44 | 100 - 14.8 - 6.16 - 0.768 | http://nonlinear.com/redirect/outbound?p=hmdb&param=HMDB0001173 | 5'-Methylthioadenosine |  | 298.0949842 | 1 | 4.573466667 |
| 5.31_134.0596m/z | HMDB0012219 | M+H-H2O | C8H9NO2 | 45.7 | 100 - 9.2 - 0.786 | http://nonlinear.com/redirect/outbound?p=hmdb&param=HMDB0012219 | Dopamine quinone |  | 134.059713 | 1 | 5.1268 |
| 4.07_327.1174m/z | HMDB0010319 | M+NH4 | C14H15NO7 | 44.6 | 100 - 15.9 - 2.63 - 0.284 | http://nonlinear.com/redirect/outbound?p=hmdb&param=HMDB0010319 | Indoxyl glucuronide |  | 327.1171192 | 1 | 3.962833333 |
| 4.06_253.0921m/z | HMDB0000071 | M+H, M+Na | C10H12N4O4 | 44.5 | 100 - 12.6 - 1.55 - 0.129 | http://nonlinear.com/redirect/outbound?p=hmdb&param=HMDB0000071 | Deoxyinosine | 252.0847557 | 253.0920322 | 1 | 3.9529 |
| 4.43_261.0892m/z | HMDB0034367 | M+H-H2O | C10H18N2O5S | 43.7 | 100 - 12.7 - 6.3 - 0.697 - 0.11 | http://nonlinear.com/redirect/outbound?p=hmdb&param=HMDB0034367 | gamma-Glutamylmethionine |  | 261.0889422 | 1 | 4.305216667 |
| 6.29_203.0786n | HMDB0000803 | M+H-H2O | C8H15NO6 | 29.7 | 100 - 9.42 - 1.63 - 0.125 | http://nonlinear.com/redirect/outbound?p=hmdb&param=HMDB0000803 | beta-N-Acetylglucosamine |  | 204.0853927 | 1 | 6.167483333 |
| 5.62_350.0856m/z | HMDB0010316 | M+Na | C14H17NO8 | 45.8 | 100 - 16 - 2.84 - 0.318 | http://nonlinear.com/redirect/outbound?p=hmdb&param=HMDB0010316 | Acetaminophen glucuronide |  | 350.0848401 | 1 | 5.536966667 |
| 4.58_280.1047n | HMDB0011167 | M+H, M+Na, M+K | C13H16N2O5 | 44.8 | 100 - 15.2 - 2.1 - 0.202 | http://nonlinear.com/redirect/outbound?p=hmdb&param=HMDB0011167 | L-beta-aspartyl-L-phenylalanine | 280.1046563 | 281.1119327 | 1 | 4.13825 |
| 4.83_234.0785m/z | HMDB0039102 | M+H-H2O | C12H13NO5 | 43.2 | 100 - 13.7 - 1.89 - 0.174 | http://nonlinear.com/redirect/outbound?p=hmdb&param=HMDB0039102 | N-Carboxyacetyl-D-phenylalanine |  | 234.0781856 | 1 | 4.725333333 |
| 6.12_490.1453n | HMDB0012634 | M+K | C23H35NO7S | 43.2 | 100 - 26.7 - 9.39 - 1.84 - 0.306 | http://nonlinear.com/redirect/outbound?p=hmdb&param=HMDB0012634 | 20-COOH-leukotriene E4 |  | 508.1789856 | 1 | 6.045833333 |
| 2.01_235.1179m/z | HMDB0028893 | M+H-H2O | C11H16N4O3 | 43.9 | 100 - 13.7 - 1.48 - 0.118 | http://nonlinear.com/redirect/outbound?p=hmdb&param=HMDB0028893 | Histidinyl-Proline |  | 235.1174153 | 1 | 1.923133333 |
| 5.21_197.1277m/z | HMDB0029135 | M+H-H2O | C10H18N2O3 | 44.2 | 100 - 11.9 - 1.26 | http://nonlinear.com/redirect/outbound?p=hmdb&param=HMDB0029135 | Valyl-Proline |  | 197.1275678 | 1 | 4.924583333 |
| 5.66_276.1097n | HMDB0029156 | M+H-H2O | C14H18N2O5 | 44 | 100 - 16.3 - 2.27 - 0.226 | http://nonlinear.com/redirect/outbound?p=hmdb&param=HMDB0029156 | Glutamylphenylalanine |  | 277.1168809 | 1 | 5.666 |
| 2.67_227.1745m/z | HMDB0028911 | M+H-H2O | C12H24N2O3 | 42.5 | 100 - 14.1 - 1.54 - 0.124 | http://nonlinear.com/redirect/outbound?p=hmdb&param=HMDB0028911 | Isoleucyl-Leucine |  | 227.174014 | 1 | 3.31165 |
| 3.29_183.0524n | HMDB0000017 | M+H, M+Na, M+H-H2O | C8H9NO4 | 44.9 | 100 - 9.27 - 1.2 | http://nonlinear.com/redirect/outbound?p=hmdb&param=HMDB0000017 | 4-Pyridoxic acid | 183.0521171 | 184.0593935 | 1 | 3.2168 |
| 6.66_222.1114m/z | HMDB0094801 | M+Na | C10H17NO3 | 44.3 | 100 - 11.5 - 1.22 | http://nonlinear.com/redirect/outbound?p=hmdb&param=HMDB0094801 | 2-octenoylglycine |  | 222.1112051 | 1 | 6.523166667 |
| 2.54_283.1389m/z | HMDB0028736 | M+Na | C10H20N4O4 | 45.1 | 100 - 12.7 - 1.56 - 0.13 | http://nonlinear.com/redirect/outbound?p=hmdb&param=HMDB0028736 | Asparaginyl-Lysine |  | 283.1386848 | 1 | 3.907983333 |
| 5.84_226.1542m/z | HMDB0029022 | M+H-H2O | C11H21N3O3 | 43.9 | 100 - 13.3 - 1.44 - 0.113 | http://nonlinear.com/redirect/outbound?p=hmdb&param=HMDB0029022 | Prolyl-Lysine |  | 226.1539407 | 1 | 5.758066667 |
| 3.90_334.1595m/z | HMDB0028711 | M+Na | C12H21N7O3 | 44.3 | 100 - 15.9 - 1.8 - 0.153 | http://nonlinear.com/redirect/outbound?p=hmdb&param=HMDB0028711 | Arginyl-Histidine |  | 334.1587471 | 1 | 3.643133333 |
| 4.63_229.1064m/z | HMDB0060410 | M+NH4 | C7H9N5O3 | 42.7 | 100 - 9.62 - 1.03 | http://nonlinear.com/redirect/outbound?p=hmdb&param=HMDB0060410 | 6-Carboxy-5,6,7,8-tetrahydropterin |  | 229.1059002 | 1 | 4.182416667 |
| 3.97_198.0865m/z | HMDB0032055 | M+H | C8H11N3O3 | 43.7 | 100 - 9.99 - 1.07 | http://nonlinear.com/redirect/outbound?p=hmdb&param=HMDB0032055 | N-Acetylhistidine |  | 198.086052 | 1 | 3.855483333 |
| 3.44_217.1537m/z | HMDB0094804 | M+NH4 | C10H17NO3 | 43.1 | 100 - 11.5 - 1.22 | http://nonlinear.com/redirect/outbound?p=hmdb&param=HMDB0094804 | 5-octenoylglycine |  | 217.153349 | 1 | 3.403066667 |
| 6.62_386.2518m/z | HMDB0005099 | M+NH4 | C20H32O6 | 40.6 | 100 - 22.2 - 3.59 - 0.431 | http://nonlinear.com/redirect/outbound?p=hmdb&param=HMDB0005099 | Thromboxane B3 |  | 386.2516013 | 1 | 6.6055 |
| 7.51_625.3441n | HMDB0002579 | M+H, M+K, M+H-H2O | C32H51NO11 | 44.2 | 100 - 36 - 8.55 - 1.52 - 0.223 | http://nonlinear.com/redirect/outbound?p=hmdb&param=HMDB0002579 | Glycochenodeoxycholic acid 3-glucuronide | 625.3427595 | 626.3500359 | 1 | 7.433466667 |
| 3.22_219.0557n | HMDB0060426 | M+H, M+Na, M+K, M+H-H2O | C11H9NO4 | 41.8 | 100 - 12.5 - 1.54 - 0.128 | http://nonlinear.com/redirect/outbound?p=hmdb&param=HMDB0060426 | 8-Methoxykynurenate | 219.0552951 | 220.0625716 | 1 | 3.0588 |
| 5.41_136.0750m/z | HMDB0000073 | M+H-H2O | C8H11NO2 | 43.4 | 100 - 9.22 - 0.789 | http://nonlinear.com/redirect/outbound?p=hmdb&param=HMDB0000073 | Dopamine |  | 136.0747281 | 1 | 5.273966667 |
| 6.59_260.1148n | HMDB0060478 | M+NH4 | C9H13N3O5 | 42.6 | 100 - 11.2 - 1.6 - 0.132 | http://nonlinear.com/redirect/outbound?p=hmdb&param=HMDB0060478 | gamma-Glutamyl-beta-cyanoalanine |  | 261.1214488 | 1 | 6.4991 |
| 5.49_431.2192m/z | HMDB0114745 | M+H | C21H35O7P | 44.5 | 100 - 23.4 - 4.05 - 0.521 | http://nonlinear.com/redirect/outbound?p=hmdb&param=HMDB0114745 | LysoPA(18:4/0:0) |  | 431.2189802 | 1 | 5.466666667 |
| 0.94_118.0608m/z | HMDB0000128 | M+H | C3H7N3O2 | 44 | 100 - 4.5 - 0.493 | http://nonlinear.com/redirect/outbound?p=hmdb&param=HMDB0000128 | Guanidoacetic acid |  | 118.0605506 | 1 | 0.93465 |
| 1.46_127.0991n | HMDB0002284 | M+H | C7H16N2O | 42.6 | 100 - 8.52 - 0.526 | http://nonlinear.com/redirect/outbound?p=hmdb&param=HMDB0002284 | N-Acetylcadaverine |  | 145.1324999 | 1 | 0.913133333 |
| 3.58_149.0217n | HMDB0001886 | M+H | C6H6N4O2 | 43.7 | 100 - 8.1 - 0.701 | http://nonlinear.com/redirect/outbound?p=hmdb&param=HMDB0001886 | 3-Methylxanthine |  | 167.0556116 | 1 | 3.459716667 |
| 4.38_232.1534m/z | HMDB0002013 | M+H | C11H21NO4 | 42 | 100 - 12.7 - 1.56 - 0.13 | http://nonlinear.com/redirect/outbound?p=hmdb&param=HMDB0002013 | Butyrylcarnitine |  | 232.1529842 | 1 | 4.3148 |
| 7.09_312.2155m/z | HMDB0013325 | M+H | C17H29NO4 | 43.4 | 100 - 19.2 - 2.57 - 0.258 | http://nonlinear.com/redirect/outbound?p=hmdb&param=HMDB0013325 | 2-trans,4-cis-Decadienoylcarnitine |  | 312.2148975 | 1 | 7.039633333 |
| 6.07_196.0599m/z | HMDB0001229 | M+H | C9H9NO4 | 43.4 | 100 - 10.4 - 1.3 | http://nonlinear.com/redirect/outbound?p=hmdb&param=HMDB0001229 | Dopaquinone |  | 196.0593942 | 1 | 5.920833333 |
| 5.12_422.2369m/z | HMDB0002200 | M+H-H2O | C23H37NO5S | 42.1 | 100 - 26.7 - 8.96 - 1.72 - 0.268 | http://nonlinear.com/redirect/outbound?p=hmdb&param=HMDB0002200 | Leukotriene E4 |  | 422.2368861 | 1 | 5.032266667 |
| 3.63_295.1271m/z | HMDB0029106 | M+H | C14H18N2O5 | 43.1 | 100 - 16.3 - 2.27 - 0.226 | http://nonlinear.com/redirect/outbound?p=hmdb&param=HMDB0029106 | Tyrosyl-Hydroxyproline |  | 295.1274243 | 1 | 3.543066667 |
| 6.91_200.1274m/z | HMDB0094805 | M+H | C10H17NO3 | 44.4 | 100 - 11.5 - 1.22 | http://nonlinear.com/redirect/outbound?p=hmdb&param=HMDB0094805 | 6-octenoylglycine |  | 200.1271579 | 1 | 6.806066667 |
| 5.17_263.1014m/z | HMDB0000706 | M+H-H2O, M+NH4 | C13H16N2O5 | 43.6 | 100 - 15.2 - 2.1 - 0.202 | http://nonlinear.com/redirect/outbound?p=hmdb&param=HMDB0000706 | Aspartylphenylalanine | 280.1046578 | 263.1013696 | 1 | 5.277266667 |
| 7.11_363.2151m/z | HMDB0000063 | M+H | C21H30O5 | 39 | 100 - 23.2 - 3.61 - 0.42 | http://nonlinear.com/redirect/outbound?p=hmdb&param=HMDB0000063 | Cortisol |  | 363.2149481 | 1 | 7.0081 |
| 2.10_209.1020m/z | HMDB0028689 | M+H-H2O | C9H14N4O3 | 42.9 | 100 - 11.5 - 1.22 | http://nonlinear.com/redirect/outbound?p=hmdb&param=HMDB0028689 | Alanyl-Histidine |  | 209.1021931 | 1 | 2.02775 |
| 8.09_325.2120m/z | HMDB0001999 | M+Na | C20H30O2 | 35.8 | 100 - 22.1 - 2.73 - 0.244 | http://nonlinear.com/redirect/outbound?p=hmdb&param=HMDB0001999 | Eicosapentaenoic acid |  | 325.2109563 | 1 | 7.72405 |
| 6.35_170.0595m/z | HMDB0000734 | M+H-H2O | C11H9NO2 | 41.9 | 100 - 12.4 - 1.12 | http://nonlinear.com/redirect/outbound?p=hmdb&param=HMDB0000734 | Indoleacrylic acid |  | 170.0590326 | 1 | 6.240466667 |
| 1.97_261.1434m/z | HMDB0028822 | M+H | C11H20N2O5 | 42.3 | 100 - 13 - 1.81 - 0.163 | http://nonlinear.com/redirect/outbound?p=hmdb&param=HMDB0028822 | Glutamylisoleucine |  | 261.1427443 | 1 | 2.270133333 |
| 6.32_395.2522m/z | HMDB0011154 | M+H | C19H39O6P | 42.3 | 100 - 21.2 - 3.37 - 0.398 | http://nonlinear.com/redirect/outbound?p=hmdb&param=HMDB0011154 | LysoPA(P-16:0e/0:0) |  | 395.2519091 | 1 | 6.237716667 |
| 1.92_153.0404m/z | HMDB0000786 | M+H | C5H4N4O2 | 42.6 | 100 - 6.99 - 0.623 | http://nonlinear.com/redirect/outbound?p=hmdb&param=HMDB0000786 | Oxypurinol |  | 153.0398598 | 1 | 2.27705 |
| 6.84_498.2675m/z | HMDB0010338 | M+NH4, M+Na, M+K | C25H36O9 | 42.2 | 100 - 27.8 - 5.57 - 0.832 - 0.103 | http://nonlinear.com/redirect/outbound?p=hmdb&param=HMDB0010338 | 11-Oxo-androsterone glucuronide | 480.2326443 | 498.2664699 | 1 | 6.946133333 |
| 5.77_433.2349m/z | HMDB0114744 | M+H | C21H37O7P | 43.8 | 100 - 23.4 - 4.05 - 0.522 | http://nonlinear.com/redirect/outbound?p=hmdb&param=HMDB0114744 | LysoPA(18:3(9Z,12Z,15Z)/0:0) |  | 433.2340768 | 1 | 5.7333 |
| 7.64_308.2206m/z | HMDB0031098 | M+NH4 | C18H26O3 | 42.6 | 100 - 19.9 - 2.49 - 0.233 | http://nonlinear.com/redirect/outbound?p=hmdb&param=HMDB0031098 | 4-Oxo-9,11,13,15-octadecatetraenoic acid |  | 308.2202508 | 1 | 7.6988 |
| 7.34_463.2670m/z | HMDB0010340 | M+H | C26H38O7 | 41.6 | 100 - 28.8 - 5.44 - 0.77 | http://nonlinear.com/redirect/outbound?p=hmdb&param=HMDB0010340 | Retinyl beta-glucuronide |  | 463.2664345 | 1 | 7.398216667 |
| 5.91_316.1278m/z | HMDB0029009 | M+Na | C14H19N3O4 | 43.8 | 100 - 16.6 - 2.12 - 0.199 | http://nonlinear.com/redirect/outbound?p=hmdb&param=HMDB0029009 | Phenylalanyl-Gamma-glutamate |  | 316.1274041 | 1 | 5.828066667 |
| 6.62_261.0981n | HMDB0028730 | M+H-H2O | C9H15N3O6 | 39.3 | 100 - 11.2 - 1.81 - 0.156 | http://nonlinear.com/redirect/outbound?p=hmdb&param=HMDB0028730 | Asparaginyl-Glutamic acid |  | 244.0915855 | 1 | 4.182166667 |
| 5.94_200.1040n | HMDB0000350 | M+H-H2O | C10H18O5 | 42.6 | 100 - 11.2 - 1.6 - 0.132 | http://nonlinear.com/redirect/outbound?p=hmdb&param=HMDB0000350 | 3-Hydroxysebacic acid |  | 201.1107921 | 1 | 5.833466667 |
| 4.46_246.1205n | HMDB0011166 | M+H, M+Na, M+K | C10H18N2O5 | 43 | 100 - 11.9 - 1.68 - 0.144 | http://nonlinear.com/redirect/outbound?p=hmdb&param=HMDB0011166 | L-beta-aspartyl-L-leucine | 246.1201445 | 247.1274209 | 1 | 4.3763 |
| 4.54_274.1175m/z | HMDB0029050 | M+H-H2O | C14H17N3O4 | 43.2 | 100 - 16.6 - 2.11 - 0.199 | http://nonlinear.com/redirect/outbound?p=hmdb&param=HMDB0029050 | Seryltryptophan |  | 274.1170704 | 1 | 4.438133333 |
| 5.76_191.0575n | HMDB0000763 | M+H, M+NH4, M+H-H2O | C10H9NO3 | 42.8 | 100 - 11.4 - 1.21 | http://nonlinear.com/redirect/outbound?p=hmdb&param=HMDB0000763 | 5-Hydroxyindoleacetic acid | 191.0573075 | 192.0645839 | 1 | 5.663933333 |
| 6.22_272.2130n | HMDB0011684 | M+H-H2O | C14H28N2O3 | 42.8 | 100 - 16.3 - 1.86 - 0.16 | http://nonlinear.com/redirect/outbound?p=hmdb&param=HMDB0011684 | N(6)-(Octanoyl)lysine |  | 255.2086691 | 1 | 6.562633333 |
| 2.72_276.1431m/z | HMDB0039780 | M+H-H2O | C12H23NO7 | 42.8 | 100 - 13.9 - 2.33 - 0.234 | http://nonlinear.com/redirect/outbound?p=hmdb&param=HMDB0039780 | N-(1-Deoxy-1-fructosyl)isoleucine |  | 276.1426864 | 1 | 3.173733333 |
| 4.75_159.0909m/z | HMDB0000259 | M+H-H2O | C10H12N2O | 41.9 | 100 - 11.7 - 0.833 | http://nonlinear.com/redirect/outbound?p=hmdb&param=HMDB0000259 | Serotonin |  | 159.0909419 | 1 | 4.636633333 |
| 5.31_184.0597m/z | HMDB0061679 | M+H | C9H13NO3 | 42.6 | 100 - 10.4 - 1.1 | http://nonlinear.com/redirect/outbound?p=hmdb&param=HMDB0061679 | 3,4,5,6-Tetrahydrohippuric acid |  | 184.0958604 | 1 | 5.831316667 |
| 7.42_257.1736m/z | HMDB0000394 | M+H-H2O | C14H26O5 | 42.1 | 100 - 15.6 - 2.17 - 0.212 | http://nonlinear.com/redirect/outbound?p=hmdb&param=HMDB0000394 | 3-Hydroxytetradecanedioic acid |  | 257.1732875 | 1 | 7.3911 |
| 4.61_326.0858m/z | HMDB0059997 | M+NH4, M+Na, M+K, M+H, M+H-H2O | C14H15NO8 | 42.1 | 100 - 16 - 2.84 - 0.318 | http://nonlinear.com/redirect/outbound?p=hmdb&param=HMDB0059997 | Dihyroxy-1H-indole glucuronide I | 325.0785023 | 326.0858111 | 1 | 4.481566667 |
| 7.72_414.2984m/z | HMDB0062332 | M+H | C26H39NO3 | 42.3 | 100 - 29 - 4.68 - 0.544 | http://nonlinear.com/redirect/outbound?p=hmdb&param=HMDB0062332 | N-Docosahexaenoyl GABA |  | 414.297843 | 1 | 7.875966667 |
| 7.45_229.1425m/z | HMDB0000413 | M+H-H2O | C12H22O5 | 41.6 | 100 - 13.4 - 1.86 - 0.169 | http://nonlinear.com/redirect/outbound?p=hmdb&param=HMDB0000413 | 3-Hydroxydodecanedioic acid |  | 229.1419172 | 1 | 6.513883333 |
| 3.61_183.0507m/z | HMDB0001973 | M+H | C6H6N4O3 | 42.3 | 100 - 8.13 - 0.91 | http://nonlinear.com/redirect/outbound?p=hmdb&param=HMDB0001973 | 9-Methyluric acid |  | 183.0504752 | 1 | 3.488916667 |
| 4.11_140.0699m/z | HMDB0094701 | M+H-H2O | C7H11NO3 | 42.6 | 100 - 8.18 - 0.909 | http://nonlinear.com/redirect/outbound?p=hmdb&param=HMDB0094701 | N-Acetylproline |  | 140.0697225 | 1 | 3.2168 |
| 6.04_186.1118m/z | HMDB0094730 | M+H | C9H15NO3 | 43 | 100 - 10.4 - 1.1 | http://nonlinear.com/redirect/outbound?p=hmdb&param=HMDB0094730 | 4-Hepteneoylglycine |  | 186.1115004 | 1 | 5.906266667 |
| 4.75_146.0594m/z | HMDB0001424 | M+H-H2O | C9H9NO2 | 42.6 | 100 - 10.3 - 0.886 | http://nonlinear.com/redirect/outbound?p=hmdb&param=HMDB0001424 | 4-(3-Pyridyl)-3-butenoic acid |  | 146.0593125 | 1 | 4.636633333 |
| 6.18_310.1407n | HMDB0011737 | M+NH4 | C10H16N2O7 | 42.5 | 100 - 12 - 2.1 - 0.194 | http://nonlinear.com/redirect/outbound?p=hmdb&param=HMDB0011737 | gamma-Glutamylglutamic acid |  | 294.1318655 | 1 | 6.2148 |
| 5.84_266.1013m/z | HMDB0059732 | M+H, M+Na, M+K | C13H15NO5 | 40.7 | 100 - 14.8 - 2.04 - 0.195 | http://nonlinear.com/redirect/outbound?p=hmdb&param=HMDB0059732 | 2-(2-Phenylacetoxy)propionylglycine | 265.0934481 | 266.1007245 | 1 | 5.7333 |
| 7.61_267.1943m/z | HMDB0002261 | M+Na | C14H28O3 | 43.2 | 100 - 15.6 - 1.75 - 0.147 | http://nonlinear.com/redirect/outbound?p=hmdb&param=HMDB0002261 | 2-Hydroxymyristic acid |  | 267.1935573 | 1 | 7.060466667 |
| 5.60_302.1950m/z | HMDB0061088 | M+NH4 | C15H24O5 | 42.3 | 100 - 16.7 - 2.33 - 0.235 | http://nonlinear.com/redirect/outbound?p=hmdb&param=HMDB0061088 | Dihydroartemisinin |  | 302.1943649 | 1 | 5.536966667 |
| 5.84_272.1845m/z | HMDB0061633 | M+H-H2O | C14H27NO5 | 42.9 | 100 - 16 - 2.23 - 0.22 | http://nonlinear.com/redirect/outbound?p=hmdb&param=HMDB0061633 | 3-hydroxyhexanoyl carnitine |  | 272.1843717 | 1 | 5.920833333 |
| 6.00_235.1067m/z | HMDB0029004 | M+H-H2O | C12H16N2O4 | 42.7 | 100 - 14 - 1.74 - 0.152 | http://nonlinear.com/redirect/outbound?p=hmdb&param=HMDB0029004 | Phenylalanyl-Serine |  | 235.1066302 | 1 | 5.892566667 |
| 6.32_218.0935n | HMDB0006239 | M+H-H2O, M+Na | C9H20N2OS2 | 36.7 | 100 - 12.3 - 9.94 - 1.09 - 0.322 | http://nonlinear.com/redirect/outbound?p=hmdb&param=HMDB0006239 | S-aminomethyldihydrolipoamide | 236.1036249 | 219.1003366 | 1 | 6.240466667 |
| 3.94_100.0753m/z | HMDB0000883 | M+H-H2O | C5H11NO2 | 43 | 100 - 5.98 - 0.56 | http://nonlinear.com/redirect/outbound?p=hmdb&param=HMDB0000883 | L-Valine |  | 100.075185 | 1 | 3.8923 |
| 7.58_250.1922n | HMDB0031072 | M+Na | C14H28O2 | 42.6 | 100 - 15.5 - 1.54 - 0.114 | http://nonlinear.com/redirect/outbound?p=hmdb&param=HMDB0031072 | 12-Methyltridecanoic acid |  | 251.1994231 | 1 | 7.3564 |
| 2.18_363.1537m/z | HMDB0037847 | M+H-H2O | C18H24N2O7 | 42.2 | 100 - 20.7 - 3.48 - 0.425 | http://nonlinear.com/redirect/outbound?p=hmdb&param=HMDB0037847 | N-(1-Deoxy-1-fructosyl)tryptophan |  | 363.153139 | 1 | 2.0828 |
| 2.28_204.1334m/z | HMDB0028846 | M+H | C8H17N3O3 | 41.3 | 100 - 10.1 - 1.07 | http://nonlinear.com/redirect/outbound?p=hmdb&param=HMDB0028846 | Glycyl-Lysine |  | 204.1330059 | 1 | 2.190966667 |
| 5.02_254.1488m/z | HMDB0001959 | M+Na | C10H21N3O3 | 43.3 | 100 - 12.3 - 1.31 | http://nonlinear.com/redirect/outbound?p=hmdb&param=HMDB0001959 | Gamma-Aminobutyryl-lysine |  | 254.148146 | 1 | 4.985133333 |
| 4.64_303.1418n | HMDB0039423 | M+H, M+Na | C12H21N3O6 | 42.1 | 100 - 14.5 - 2.22 - 0.22 | http://nonlinear.com/redirect/outbound?p=hmdb&param=HMDB0039423 | N5-Acetyl-N2-gamma-L-glutamyl-L-ornithine | 303.1412517 | 304.1485281 | 1 | 4.5058 |
| 7.90_490.2753n | HMDB0060121 | M+NH4, M+K | C24H42O10 | 44.7 | 100 - 26.8 - 5.51 - 0.835 - 0.107 | http://nonlinear.com/redirect/outbound?p=hmdb&param=HMDB0060121 | 9-Hydroxy-10-O-D-glucuronoside-12Z-octadecenoate | 490.2745462 | 508.3083718 | 1 | 7.837466667 |
| 4.00_266.1041m/z | HMDB0059772 | M+H | C13H15NO5 | 41.9 | 100 - 14.8 - 2.04 - 0.195 | http://nonlinear.com/redirect/outbound?p=hmdb&param=HMDB0059772 | N-Phenylacetylglutamic acid |  | 266.1042934 | 1 | 3.90075 |
| 3.90_331.0944m/z | HMDB0028887 | M+K | C12H16N6O3 | 41.8 | 100 - 15.5 - 1.74 - 0.146 | http://nonlinear.com/redirect/outbound?p=hmdb&param=HMDB0028887 | Histidinyl-Histidine |  | 331.0944277 | 1 | 3.786566667 |
| 6.25_294.1686m/z | HMDB0028879 | M+H-H2O | C12H21N7O3 | 42.1 | 100 - 15.9 - 1.8 - 0.153 | http://nonlinear.com/redirect/outbound?p=hmdb&param=HMDB0028879 | Histidinyl-Arginine |  | 294.1684473 | 1 | 5.781433333 |
| 4.51_385.1781m/z | HMDB0004030 | M+K | C21H30O4 | 43 | 100 - 23.2 - 3.39 - 0.371 | http://nonlinear.com/redirect/outbound?p=hmdb&param=HMDB0004030 | 21-Deoxycortisol |  | 385.1775316 | 1 | 4.415716667 |
| 1.60_123.0547m/z | HMDB0001406 | M+H | C6H6N2O | 41.8 | 100 - 7.33 - 0.437 | http://nonlinear.com/redirect/outbound?p=hmdb&param=HMDB0001406 | Niacinamide |  | 123.0543467 | 1 | 1.553883333 |
| 7.26_221.1526m/z | HMDB0000529 | M+Na | C12H22O2 | 42.2 | 100 - 13.3 - 1.23 | http://nonlinear.com/redirect/outbound?p=hmdb&param=HMDB0000529 | 5Z-Dodecenoic acid |  | 221.1521547 | 1 | 7.162883333 |
| 2.80_200.0134n | HMDB0006409 | M+H | C8H11NO4S | 41 | 100 - 10.1 - 5.8 - 0.515 | http://nonlinear.com/redirect/outbound?p=hmdb&param=HMDB0006409 | Tyramine-O-sulfate |  | 218.0471751 | 1 | 2.20755 |
| 5.69_195.1120m/z | HMDB0011180 | M+H-H2O, M+NH4 | C10H16N2O3 | 39.1 | 100 - 11.8 - 1.26 | http://nonlinear.com/redirect/outbound?p=hmdb&param=HMDB0011180 | L-prolyl-L-proline | 212.1151184 | 195.1118301 | 1 | 5.578766667 |
| 4.48_197.0656m/z | HMDB0002026 | M+H | C7H8N4O3 | 41 | 100 - 9.24 - 1 | http://nonlinear.com/redirect/outbound?p=hmdb&param=HMDB0002026 | 1,9-Dimethyluric acid |  | 197.0654874 | 1 | 4.3714 |
| 5.19_381.2260m/z | HMDB0012983 | M+Na | C15H30N6O4 | 42.1 | 100 - 18.9 - 2.52 - 0.251 | http://nonlinear.com/redirect/outbound?p=hmdb&param=HMDB0012983 | Kinetensin 1-3 |  | 381.2247368 | 1 | 5.1268 |
| 5.81_200.1272m/z | HMDB0094806 | M+H-H2O, M+H | C10H17NO3 | 39.9 | 100 - 11.5 - 1.22 | http://nonlinear.com/redirect/outbound?p=hmdb&param=HMDB0094806 | 7-octenoylglycine | 199.1196497 | 200.1267256 | 1 | 5.7333 |
| 6.29_288.1559n | HMDB0028725 | M+H, M+NH4, M+K | C10H20N6O4 | 42.3 | 100 - 13.4 - 1.66 - 0.142 | http://nonlinear.com/redirect/outbound?p=hmdb&param=HMDB0028725 | Asparaginyl-Arginine | 288.1553494 | 289.1626259 | 1 | 6.1888 |
| 7.05_319.2254m/z | HMDB0060098 | M+H-H2O | C20H32O4 | 41.8 | 100 - 22.2 - 3.16 - 0.338 | http://nonlinear.com/redirect/outbound?p=hmdb&param=HMDB0060098 | 9-peroxy-eicosatetraenoate |  | 319.2243701 | 1 | 6.981133333 |
| 7.49_241.1787m/z | HMDB0000872 | M+H-H2O, M+H | C14H26O4 | 40.9 | 100 - 15.6 - 1.96 - 0.179 | http://nonlinear.com/redirect/outbound?p=hmdb&param=HMDB0000872 | Tetradecanedioic acid | 258.181258 | 241.1779698 | 1 | 6.865466667 |
| 5.05_293.1594m/z | HMDB0013209 | M+NH4 | C14H17N3O3 | 41.4 | 100 - 16.5 - 1.9 - 0.164 | http://nonlinear.com/redirect/outbound?p=hmdb&param=HMDB0013209 | Alanyltryptophan |  | 293.1594196 | 1 | 4.968233333 |
| 3.66_245.0945m/z | HMDB0000030 | M+H, M+Na | C10H16N2O3S | 39.8 | 100 - 12.6 - 5.87 - 0.639 | http://nonlinear.com/redirect/outbound?p=hmdb&param=HMDB0000030 | Biotin | 244.0869345 | 245.0942109 | 1 | 3.858166667 |
| 0.81_129.0784n | HMDB0000070 | M+NH4 | C6H11NO2 | 41.7 | 100 - 7.06 - 0.624 | http://nonlinear.com/redirect/outbound?p=hmdb&param=HMDB0000070 | Pipecolic acid |  | 147.1119931 | 1 | 0.78995 |
| 4.61_132.0440m/z | HMDB0060946 | M+H-H2O, M+H | C8H7NO2 | 42 | 100 - 9.17 - 0.784 | http://nonlinear.com/redirect/outbound?p=hmdb&param=HMDB0060946 | NAPQI | 149.0471568 | 132.0438685 | 1 | 4.5058 |
| 6.74_269.1889m/z | HMDB0000053 | M+H-H2O | C19H26O2 | 40.9 | 100 - 20.9 - 2.49 - 0.216 | http://nonlinear.com/redirect/outbound?p=hmdb&param=HMDB0000053 | Androstenedione |  | 269.1886747 | 1 | 6.7339 |
| 7.74_291.2308m/z | HMDB0060038 | M+Na | C17H32O2 | 41.9 | 100 - 18.8 - 2.08 - 0.171 | http://nonlinear.com/redirect/outbound?p=hmdb&param=HMDB0060038 | 10Z-Heptadecenoic acid |  | 291.2306056 | 1 | 7.6226 |
| 6.67_240.1713n | HMDB0000638 | M+Na | C12H24O2 | 41.9 | 100 - 13.3 - 1.23 | http://nonlinear.com/redirect/outbound?p=hmdb&param=HMDB0000638 | Dodecanoic acid |  | 223.1678275 | 1 | 6.98305 |
| 6.04_275.1014m/z | HMDB0029019 | M+H, M+NH4, M+Na, M+H-H2O | C11H16N4O3 | 40.3 | 100 - 13.7 - 1.48 - 0.118 | http://nonlinear.com/redirect/outbound?p=hmdb&param=HMDB0029019 | Prolyl-Histidine | 252.1198344 | 275.1090012 | 1 | 4.557916667 |
| 1.33_138.0423n | HMDB0061680 | M+H-H2O, M+H | C6H6N2O2 | 41.4 | 100 - 7.37 - 0.646 | http://nonlinear.com/redirect/outbound?p=hmdb&param=HMDB0061680 | 2-Aminonicotinic acid | 138.0421016 | 139.0494706 | 1 | 1.44255 |
| 6.12_393.2370m/z | HMDB0007849 | M+H-H2O | C19H39O7P | 40.1 | 100 - 21.3 - 3.59 - 0.443 | http://nonlinear.com/redirect/outbound?p=hmdb&param=HMDB0007849 | LysoPA(0:0/16:0) |  | 393.2360056 | 1 | 6.0578 |
| 4.64_288.1331m/z | HMDB0029093 | M+H-H2O | C15H19N3O4 | 41.6 | 100 - 17.7 - 2.3 - 0.222 | http://nonlinear.com/redirect/outbound?p=hmdb&param=HMDB0029093 | Tryptophyl-Threonine |  | 288.132907 | 1 | 4.534883333 |
| 1.53_130.0494m/z | HMDB0000267 | M+H, M+Na | C5H7NO3 | 41.6 | 100 - 5.97 - 0.765 | http://nonlinear.com/redirect/outbound?p=hmdb&param=HMDB0000267 | Pyroglutamic acid | 129.0419248 | 130.0492012 | 1 | 1.746466667 |
| 4.95_144.0471m/z | HMDB0029440 | M+H-H2O | C6H11NO2S | 37.2 | 100 - 7.86 - 5.2 - 0.356 | http://nonlinear.com/redirect/outbound?p=hmdb&param=HMDB0029440 | trans-S-(1-Propenyl)-L-cysteine |  | 144.0470389 | 1 | 3.643133333 |
| 5.87_186.1248n | HMDB0039533 | M+H-H2O | C10H18O3 | 41.1 | 100 - 11.1 - 1.18 | http://nonlinear.com/redirect/outbound?p=hmdb&param=HMDB0039533 | (E)-10-Hydroxy-8-decenoic acid |  | 169.1211338 | 1 | 5.799133333 |
| 5.87_351.0941n | HMDB0060001 | M+NH4, M+Na, M+K, M+H | C16H17NO8 | 41.3 | 100 - 18.2 - 3.2 - 0.382 | http://nonlinear.com/redirect/outbound?p=hmdb&param=HMDB0060001 | Indole-3-acetic-acid-O-glucuronide | 351.0934602 | 369.1272858 | 1 | 5.7654 |
| 5.50_174.1117m/z | HMDB0031101 | M+NH4 | C8H12O3 | 39 | 100 - 8.9 - 0.966 | http://nonlinear.com/redirect/outbound?p=hmdb&param=HMDB0031101 | 8-Hydroxy-5,6-octadienoic acid |  | 174.1116509 | 1 | 5.625883333 |
| 4.67_181.0714m/z | HMDB0002825 | M+H | C7H8N4O2 | 41.1 | 100 - 9.2 - 0.791 | http://nonlinear.com/redirect/outbound?p=hmdb&param=HMDB0002825 | Theobromine |  | 181.0713072 | 1 | 4.178733333 |
| 3.04_140.0812m/z | HMDB0012234 | M+H | C6H9N3O | 41.3 | 100 - 7.73 - 0.467 | http://nonlinear.com/redirect/outbound?p=hmdb&param=HMDB0012234 | Histidinal |  | 140.0810102 | 1 | 2.93365 |
| 2.53_220.0807m/z | HMDB0037848 | M+H-H2O | C8H15NO7 | 35.7 | 100 - 9.46 - 1.84 - 0.145 | http://nonlinear.com/redirect/outbound?p=hmdb&param=HMDB0037848 | N-(1-Deoxy-1-fructosyl)glycine |  | 220.0800012 | 1 | 2.474133333 |
| 2.01_269.1595m/z | HMDB0028888 | M+H | C12H20N4O3 | 41.2 | 100 - 14.8 - 1.64 - 0.135 | http://nonlinear.com/redirect/outbound?p=hmdb&param=HMDB0028888 | Histidinyl-Isoleucine |  | 269.159381 | 1 | 2.362483333 |
| 5.00_244.1534m/z | HMDB0062555 | M+H-H2O | C12H23NO5 | 41.8 | 100 - 13.8 - 1.91 - 0.176 | http://nonlinear.com/redirect/outbound?p=hmdb&param=HMDB0062555 | hydroxyisovaleroyl carnitine |  | 244.1529027 | 1 | 4.9153 |
| 7.74_342.2028n | HMDB0038940 | M+NH4 | C18H30O6 | 41.3 | 100 - 20 - 3.14 - 0.36 | http://nonlinear.com/redirect/outbound?p=hmdb&param=HMDB0038940 | (-)-11-Hydroxy-9,15,16-trioxooctadecanoic acid |  | 360.2366121 | 1 | 6.158066667 |
| 6.77_370.2569m/z | HMDB0001335 | M+NH4 | C20H32O5 | 40.6 | 100 - 22.2 - 3.37 - 0.385 | http://nonlinear.com/redirect/outbound?p=hmdb&param=HMDB0001335 | Prostaglandin I2 |  | 370.2565713 | 1 | 6.720716667 |
| 5.66_404.0729n | HMDB0029222 | M+NH4 | C19H16O10 | 41.4 | 100 - 21.1 - 4.17 - 0.567 | http://nonlinear.com/redirect/outbound?p=hmdb&param=HMDB0029222 | Urolithin A-3-O-glucuronide |  | 422.1064298 | 1 | 5.578766667 |
| 6.29_286.1096m/z | HMDB0062735 | M+H, M+K | C11H21NO5 | 39.7 | 100 - 12.7 - 1.77 - 0.156 | http://nonlinear.com/redirect/outbound?p=hmdb&param=HMDB0062735 | (R)-3-hydroxybutyrylcarnitine | 247.1407031 | 286.1092902 | 1 | 6.045833333 |
| 2.01_239.1009n | HMDB0013031 | M+H, M+K, M+Na | C9H13N5O3 | 40.7 | 100 - 11.8 - 1.26 | http://nonlinear.com/redirect/outbound?p=hmdb&param=HMDB0013031 | O2'-4a-cyclic-tetrahydrobiopterin | 239.100276 | 240.1075525 | 1 | 1.9718 |
| 6.22_360.2365m/z | HMDB0062618 | M+NH4 | C18H30O6 | 40.6 | 100 - 20 - 3.14 - 0.36 | http://nonlinear.com/redirect/outbound?p=hmdb&param=HMDB0062618 | 2,3-dinor-6-oxoprostaglandin F1alpha |  | 360.2357255 | 1 | 6.163466667 |
| 7.69_245.1617n | HMDB0041993 | M+H-H2O, M+Na | C12H23NO4 | 40.6 | 100 - 13.8 - 1.7 - 0.147 | http://nonlinear.com/redirect/outbound?p=hmdb&param=HMDB0041993 | Pivaloylcarnitine | 245.1616004 | 228.1583122 | 1 | 7.56805 |
| 4.73_141.0541m/z | HMDB0000635 | M+H-H2O | C7H10O4 | 41.4 | 100 - 7.84 - 1.09 | http://nonlinear.com/redirect/outbound?p=hmdb&param=HMDB0000635 | Succinylacetone |  | 141.0539191 | 1 | 4.636633333 |
| 6.39_501.2051m/z | HMDB0006765 | M+Na | C25H34O9 | 40 | 100 - 27.8 - 5.56 - 0.83 - 0.103 | http://nonlinear.com/redirect/outbound?p=hmdb&param=HMDB0006765 | 2-Methoxy-estradiol-17b 3-glucuronide |  | 501.2060645 | 1 | 5.905416667 |
| 5.39_172.0958m/z | HMDB0062181 | M+H-H2O | C8H15NO4 | 40.8 | 100 - 9.34 - 1.21 | http://nonlinear.com/redirect/outbound?p=hmdb&param=HMDB0062181 | N-lactoyl-Valine |  | 172.0957009 | 1 | 5.273966667 |
| 3.14_237.0174m/z | HMDB0041662 | M+K | C9H10O5 | 41 | 100 - 10 - 1.48 - 0.115 | http://nonlinear.com/redirect/outbound?p=hmdb&param=HMDB0041662 | 3,4-O-Dimethylgallic acid |  | 237.017012 | 1 | 2.768733333 |
| 5.98_388.2676m/z | HMDB0004049 | M+NH4 | C20H34O6 | 40.9 | 100 - 22.3 - 3.59 - 0.432 | http://nonlinear.com/redirect/outbound?p=hmdb&param=HMDB0004049 | 20-Hydroxy-PGF2a |  | 388.2678943 | 1 | 5.905416667 |
| 7.51_321.2412m/z | HMDB0002265 | M+H-H2O | C20H34O4 | 39.8 | 100 - 22.2 - 3.16 - 0.339 | http://nonlinear.com/redirect/outbound?p=hmdb&param=HMDB0002265 | 14,15-DiHETrE |  | 321.2408215 | 1 | 7.72405 |
| 7.36_254.1144n | HMDB0032796 | M+H, M+Na, M+H-H2O | C13H18O5 | 40.5 | 100 - 14.5 - 2 - 0.188 | http://nonlinear.com/redirect/outbound?p=hmdb&param=HMDB0032796 | Methyl 3-(2,3-dihydroxy-3-methylbutyl)-4-hydroxybenzoate | 254.1135615 | 255.1208379 | 1 | 7.2558 |
| 2.63_261.0971m/z | HMDB0028972 | M+H-H2O, M+K | C10H18N2O5S | 37.9 | 100 - 12.7 - 6.3 - 0.697 - 0.11 | http://nonlinear.com/redirect/outbound?p=hmdb&param=HMDB0028972 | Methionyl-Glutamate | 278.0961593 | 261.0928711 | 1 | 1.754216667 |
| 7.11_295.1639m/z | HMDB0029108 | M+H | C15H22N2O4 | 41 | 100 - 17.4 - 2.24 - 0.215 | http://nonlinear.com/redirect/outbound?p=hmdb&param=HMDB0029108 | Tyrosyl-Isoleucine |  | 295.1641049 | 1 | 4.416233333 |
| 5.39_341.1703m/z | HMDB0028945 | M+K | C12H26N6O3 | 38.6 | 100 - 15.6 - 1.76 - 0.148 | http://nonlinear.com/redirect/outbound?p=hmdb&param=HMDB0028945 | Lysyl-Arginine |  | 341.169126 | 1 | 5.3386 |
| 4.20_170.0441m/z | HMDB0000439 | M+H | C7H7NO4 | 41.1 | 100 - 8.17 - 1.11 | http://nonlinear.com/redirect/outbound?p=hmdb&param=HMDB0000439 | 2-Furoylglycine |  | 170.0439792 | 1 | 4.141666667 |
| 1.58_283.1388m/z | HMDB0028946 | M+H-H2O, M+Na | C10H20N4O4 | 41.5 | 100 - 12.7 - 1.56 - 0.13 | http://nonlinear.com/redirect/outbound?p=hmdb&param=HMDB0028946 | Lysyl-Asparagine | 260.1472774 | 283.1387546 | 1 | 1.433566667 |
| 2.00_256.0917m/z | HMDB0029056 | M+Na | C8H15N3O5 | 41.8 | 100 - 10.1 - 1.49 - 0.116 | http://nonlinear.com/redirect/outbound?p=hmdb&param=HMDB0029056 | Threoninyl-Asparagine |  | 256.0912156 | 1 | 1.6708 |
| 6.11_286.1095m/z | HMDB0002034 | M+NH4 | C8H16N2O6S | 40.4 | 100 - 10.6 - 6.26 - 0.588 - 0.109 | http://nonlinear.com/redirect/outbound?p=hmdb&param=HMDB0002034 | Homolanthionine |  | 286.108493 | 1 | 6.032633333 |
| 6.49_357.2004m/z | HMDB0004236 | M+Na | C20H30O4 | 39.7 | 100 - 22.1 - 3.15 - 0.337 | http://nonlinear.com/redirect/outbound?p=hmdb&param=HMDB0004236 | Prostaglandin B2 |  | 357.2004644 | 1 | 6.409716667 |
| 6.76_444.2933m/z | HMDB0013045 | M+NH4 | C23H38O7 | 39.3 | 100 - 25.6 - 4.58 - 0.613 | http://nonlinear.com/redirect/outbound?p=hmdb&param=HMDB0013045 | Prostaglandin PGE2 glyceryl ester |  | 444.2923258 | 1 | 6.706966667 |
| 6.55_229.0852m/z | HMDB0031729 | M+Na | C12H14O3 | 41.1 | 100 - 13.3 - 1.42 - 0.111 | http://nonlinear.com/redirect/outbound?p=hmdb&param=HMDB0031729 | Phenylmethylglycidic ester |  | 229.0848257 | 1 | 6.706433333 |
| 5.29_245.1849m/z | HMDB0028910 | M+H | C12H24N2O3 | 38.5 | 100 - 14.1 - 1.54 - 0.124 | http://nonlinear.com/redirect/outbound?p=hmdb&param=HMDB0028910 | Isoleucyl-Isoleucine |  | 245.1840889 | 1 | 5.3578 |
| 1.72_140.0335m/z | HMDB0001241 | M+H-H2O | C6H7NO4 | 40.5 | 100 - 7.09 - 1.04 | http://nonlinear.com/redirect/outbound?p=hmdb&param=HMDB0001241 | 2-Aminomuconic acid |  | 140.0333096 | 1 | 1.694216667 |
| 5.76_195.1007m/z | HMDB0059744 | M+H-H2O | C11H16O4 | 39.4 | 100 - 12.2 - 1.51 - 0.123 | http://nonlinear.com/redirect/outbound?p=hmdb&param=HMDB0059744 | 3,4-Methyleneazelaic acid |  | 195.1002121 | 1 | 5.6813 |
| 7.26_221.0890n | HMDB0001129 | M+H-H2O, M+H | C8H15NO6 | 40.1 | 100 - 9.42 - 1.63 - 0.125 | http://nonlinear.com/redirect/outbound?p=hmdb&param=HMDB0001129 | N-Acetylmannosamine | 221.0883699 | 204.0850817 | 1 | 7.17145 |
| 5.77_182.1281m/z | HMDB0012246 | M+NH4 | C9H12N2O | 40.1 | 100 - 10.6 - 0.718 | http://nonlinear.com/redirect/outbound?p=hmdb&param=HMDB0012246 | Kynuramine |  | 182.12762 | 1 | 5.6813 |
| 5.66_204.0680m/z | HMDB0062182 | M+H-H2O | C8H15NO4S | 40 | 100 - 10.1 - 5.8 - 0.518 | http://nonlinear.com/redirect/outbound?p=hmdb&param=HMDB0062182 | N-lactoyl-Methionine |  | 204.0675666 | 1 | 5.8653 |
| 7.18_506.2934m/z | HMDB0061694 | M+H-H2O | C24H46NO9P | 37 | 100 - 27.2 - 5.41 - 0.8 | http://nonlinear.com/redirect/outbound?p=hmdb&param=HMDB0061694 | 1-Oleoylglycerophosphoserine |  | 506.292842 | 1 | 7.674966667 |
| 7.49_586.3557m/z | HMDB0002596 | M+NH4 | C30H48O10 | 40.7 | 100 - 33.4 - 7.45 - 1.25 - 0.172 | http://nonlinear.com/redirect/outbound?p=hmdb&param=HMDB0002596 | Deoxycholic acid 3-glucuronide |  | 586.3563863 | 1 | 7.4004 |
| 6.29_379.2102m/z | HMDB0000418 | M+H-H2O, M+H | C21H30O6 | 40.4 | 100 - 23.3 - 3.82 - 0.469 | http://nonlinear.com/redirect/outbound?p=hmdb&param=HMDB0000418 | 18-Hydroxycortisol | 378.2022094 | 379.2093158 | 1 | 6.182716667 |
| 7.05_429.2858n | HMDB0062330 | M+Na | C24H39NO3 | 40.5 | 100 - 26.9 - 4.09 - 0.453 | http://nonlinear.com/redirect/outbound?p=hmdb&param=HMDB0062330 | N-Arachidonoyl GABA |  | 412.2828244 | 1 | 7.4809 |
| 6.74_311.1542m/z | HMDB0032110 | M+H-H2O | C19H22NO4+ | 40 | 100 - 21.3 - 2.98 - 0.313 | http://nonlinear.com/redirect/outbound?p=hmdb&param=HMDB0032110 | Litcubine |  | 311.1532008 | 1 | 6.681633333 |
| 3.61_269.0946m/z | HMDB0028981 | M+Na | C10H18N2O3S | 26.4 | 100 - 12.7 - 5.87 - 0.641 | http://nonlinear.com/redirect/outbound?p=hmdb&param=HMDB0028981 | Methionyl-Proline |  | 269.0939278 | 1 | 3.484083333 |
| 0.97_129.0653m/z | HMDB0003423 | M+H-H2O | C5H10N2O3 | 40.5 | 100 - 6.37 - 0.789 | http://nonlinear.com/redirect/outbound?p=hmdb&param=HMDB0003423 | D-Glutamine |  | 129.0650492 | 1 | 0.941133333 |
| 6.10_526.3303m/z | HMDB0010396 | M+H-H2O | C28H50NO7P | 36.4 | 100 - 31.5 - 6.23 - 0.922 - 0.111 | http://nonlinear.com/redirect/outbound?p=hmdb&param=HMDB0010396 | LysoPC(20:4(8Z,11Z,14Z,17Z)) |  | 526.3307617 | 1 | 6.027733333 |
| 6.24_339.1901m/z | HMDB0001272 | M+H | C16H22N2O6 | 40.2 | 100 - 18.5 - 2.85 - 0.317 | http://nonlinear.com/redirect/outbound?p=hmdb&param=HMDB0001272 | Nicotine glucuronide |  | 339.1533516 | 1 | 5.816733333 |
| 3.68_292.2006m/z | HMDB0028802 | M+H, M+NH4 | C11H22N4O4 | 40.1 | 100 - 13.8 - 1.7 - 0.148 | http://nonlinear.com/redirect/outbound?p=hmdb&param=HMDB0028802 | Glutaminyllysine | 274.1667094 | 292.2003645 | 1 | 3.60265 |
| 1.43_193.0965m/z | HMDB0001390 | M+H | C10H12N2O2 | 40.1 | 100 - 11.8 - 1.04 | http://nonlinear.com/redirect/outbound?p=hmdb&param=HMDB0001390 | Hydroxycotinine |  | 193.0961012 | 1 | 1.445816667 |
| 2.45_277.0842m/z | HMDB0004818 | M+H, M+K, M+Na | C10H16N2O5S | 39.2 | 100 - 12.7 - 6.29 - 0.696 - 0.109 | http://nonlinear.com/redirect/outbound?p=hmdb&param=HMDB0004818 | Biotin sulfone | 276.0763159 | 277.0835923 | 1 | 2.363966667 |
| 6.22_296.2127n | HMDB0013121 | M+H-H2O, M+H | C21H30O2 | 39.5 | 100 - 23.1 - 2.96 - 0.274 | http://nonlinear.com/redirect/outbound?p=hmdb&param=HMDB0013121 | 7-Dehydropregnenolone | 314.2224514 | 297.2191632 | 1 | 6.163466667 |
| 7.78_385.2360m/z | HMDB0012551 | M+NH4 | C20H30O6 | 40.9 | 100 - 22.2 - 3.58 - 0.431 | http://nonlinear.com/redirect/outbound?p=hmdb&param=HMDB0012551 | 12-oxo-20-dihydroxy-leukotriene B4 |  | 384.2365376 | 1 | 7.831066667 |
| 2.45_112.0502m/z | HMDB0000630 | M+H | C4H5N3O | 40.3 | 100 - 5.52 - 0.332 | http://nonlinear.com/redirect/outbound?p=hmdb&param=HMDB0000630 | Cytosine |  | 112.0499693 | 1 | 2.393383333 |
| 6.15_263.0507m/z | HMDB0060011 | M+H | C9H14N2O3S2 | 39.1 | 100 - 12.3 - 10.4 - 1.14 - 0.363 | http://nonlinear.com/redirect/outbound?p=hmdb&param=HMDB0060011 | N-acetyl-S-(N-allylthiocarbamoyl)-L-cysteine |  | 263.0502354 | 1 | 6.0578 |
| 5.25_293.1153m/z | HMDB0011741 | M+H-H2O | C14H18N2O6 | 38.6 | 100 - 16.3 - 2.48 - 0.26 | http://nonlinear.com/redirect/outbound?p=hmdb&param=HMDB0011741 | gamma-Glutamyltyrosine |  | 293.1151498 | 1 | 5.194566667 |
| 3.34_259.0737m/z | HMDB0029045 | M+Na | C8H16N2O4S | 39.5 | 100 - 10.5 - 5.84 - 0.54 | http://nonlinear.com/redirect/outbound?p=hmdb&param=HMDB0029045 | Serylmethionine |  | 259.0733066 | 1 | 2.626983333 |
| 4.58_183.1008m/z | HMDB0062596 | M+Na | C8H16O3 | 39.4 | 100 - 8.95 - 0.97 | http://nonlinear.com/redirect/outbound?p=hmdb&param=HMDB0062596 | (7R)-7-hydroxyoctanoic Acid |  | 183.1005787 | 1 | 4.486333333 |
| 7.75_277.2149m/z | HMDB0031053 | M+Na | C16H30O2 | 41.3 | 100 - 17.7 - 1.89 - 0.15 | http://nonlinear.com/redirect/outbound?p=hmdb&param=HMDB0031053 | (E)-6-Hexadecenoic acid |  | 277.2146159 | 1 | 6.458716667 |
| 6.08_271.1069m/z | HMDB0029064 | M+K | C10H20N2O4 | 34.6 | 100 - 11.9 - 1.47 - 0.119 | http://nonlinear.com/redirect/outbound?p=hmdb&param=HMDB0029064 | Threoninyl-Isoleucine |  | 271.1059847 | 1 | 6.0063 |
| 2.54_274.0846m/z | HMDB0038662 | M+H-H2O, M+Na | C9H17NO7 | 40 | 100 - 10.6 - 1.94 - 0.166 | http://nonlinear.com/redirect/outbound?p=hmdb&param=HMDB0038662 | N-(1-Deoxy-1-fructosyl)alanine | 251.0991947 | 274.0842199 | 1 | 2.443733333 |
| 7.24_291.1723m/z | HMDB0000477 | M+K | C16H28O2 | 41.1 | 100 - 17.7 - 1.88 - 0.149 | http://nonlinear.com/redirect/outbound?p=hmdb&param=HMDB0000477 | 7Z,10Z-Hexadecadienoic acid |  | 291.1722891 | 1 | 7.14905 |
| 6.88_374.2884m/z | HMDB0002685 | M+NH4 | C20H36O5 | 39.4 | 100 - 22.2 - 3.38 - 0.386 | http://nonlinear.com/redirect/outbound?p=hmdb&param=HMDB0002685 | Prostaglandin F1a |  | 374.288242 | 1 | 6.7864 |
| 4.50_138.0674n | HMDB0061684 | M+H-H2O | C8H15NO3 | 40.2 | 100 - 9.3 - 1 | http://nonlinear.com/redirect/outbound?p=hmdb&param=HMDB0061684 | N-Acetylisoleucine |  | 156.1010119 | 1 | 4.433833333 |
| 6.64_167.0697m/z | HMDB0142136 | M+H | C9H10O3 | 40.5 | 100 - 9.96 - 1.06 | http://nonlinear.com/redirect/outbound?p=hmdb&param=HMDB0142136 | 2-(2-hydroxyphenyl)propanoic acid |  | 167.069462 | 1 | 6.564066667 |
| 5.29_287.1476m/z | HMDB0028880 | M+NH4 | C10H15N5O4 | 39.1 | 100 - 13 - 1.6 - 0.135 | http://nonlinear.com/redirect/outbound?p=hmdb&param=HMDB0028880 | Histidinyl-Asparagine |  | 287.1476884 | 1 | 5.171333333 |
| 5.96_282.1203n | HMDB0029115 | M+H, M+K | C13H18N2O5 | 37 | 100 - 15.2 - 2.1 - 0.203 | http://nonlinear.com/redirect/outbound?p=hmdb&param=HMDB0029115 | Tyrosyl-Threonine | 282.1197812 | 283.1270576 | 1 | 5.8653 |
| 5.01_314.0627n | HMDB0010314 | M+NH4 | C13H14O9 | 37.5 | 100 - 14.6 - 2.83 - 0.31 | http://nonlinear.com/redirect/outbound?p=hmdb&param=HMDB0010314 | Beta-D-Glucopyranuronic acid |  | 332.0956562 | 1 | 4.9153 |
| 1.88_121.0391m/z | HMDB0000301 | M+H-H2O | C6H6N2O2 | 39.7 | 100 - 7.37 - 0.646 | http://nonlinear.com/redirect/outbound?p=hmdb&param=HMDB0000301 | Urocanic acid |  | 121.0387852 | 1 | 1.252316667 |
| 6.22_471.2791n | HMDB0003555 | M+K | C31H46O2 | 35.9 | 100 - 34.1 - 6.06 - 0.742 | http://nonlinear.com/redirect/outbound?p=hmdb&param=HMDB0003555 | Vitamin K1 |  | 489.3120222 | 1 | 6.169166667 |
| 4.94_330.1172m/z | HMDB0010329 | M+H | C14H19NO8 | 40.4 | 100 - 16 - 2.85 - 0.319 | http://nonlinear.com/redirect/outbound?p=hmdb&param=HMDB0010329 | Dopamine glucuronide |  | 330.1166592 | 1 | 5.316833333 |
| 6.15_257.0580m/z | HMDB0028776 | M+Na | C8H14N2O4S | 38.4 | 100 - 10.5 - 5.84 - 0.538 | http://nonlinear.com/redirect/outbound?p=hmdb&param=HMDB0028776 | Cysteinyl-Hydroxyproline |  | 257.0574617 | 1 | 6.0578 |
| 4.14_316.2217m/z | HMDB0094676 | M+H | C15H29N3O4 | 39.5 | 100 - 17.8 - 2.32 - 0.225 | http://nonlinear.com/redirect/outbound?p=hmdb&param=HMDB0094676 | Val-Val-Val |  | 316.2213585 | 1 | 4.017316667 |
| 8.06_454.2546n | HMDB0033469 | M+NH4 | C25H31N3O4 | 37.8 | 100 - 28.6 - 4.78 - 0.585 | http://nonlinear.com/redirect/outbound?p=hmdb&param=HMDB0033469 | N1,N10-Dicoumaroylspermidine |  | 455.2618618 | 1 | 7.8326 |

Table S2 Gender differential metabolites in children population aged 1 to 18 years

| Description | ID | Raw p-value | P.value-adjusted | F/M |  |
| --- | --- | --- | --- | --- | --- |
| Cortisol | HMDB0000063 | 0.009181 | 0.049559 | 0.822874092 | Steroidogenesis |
| Deoxyinosine | HMDB0000071 | 0.0066274 | 0.041957 | 0.915168033 | Purine Metabolism |
| Dopamine | HMDB0000073 | 0.0016516 | 0.016345 | 1.150675211 | Catecholamine Biosynthesis |
| Guanidoacetic acid | HMDB0000128 | 2.882E-12 | 2.4814E-09 | 1.537359731 | Arginine and Proline Metabolism |
| Uric acid | HMDB0000289 | 0.0062129 | 0.040221 | 1.300190095 | Purine Metabolism |
| 3a,7b,12a-Trihydroxyoxocholanyl-Glycine | HMDB0000331 | 0.0027321 | 0.022619 | 1.36617678 | Glycine metabolism |
| 18-Hydroxycortisol | HMDB0000418 | 0.00041842 | 0.0062617 | 0.763436485 | Steroidogenesis |
| Deoxycholic acid glycine conjugate | HMDB0000631 | 0.00043735 | 0.0063823 | 1.167935887 | Bile Acid Biosynthesis |
| Indoleacrylic acid | HMDB0000734 | 0.008844 | 0.049271 | 1.190412667 | Tryptophan Metabolism |
| 5-Hydroxyindoleacetic acid | HMDB0000763 | 0.00087194 | 0.010696 | 1.578156164 | Tryptophan Metabolism |
| Oxypurinol | HMDB0000786 | 0.0043816 | 0.031283 | 1.165094325 | Purine Metabolism |
| Cotinine glucuronide | HMDB0001013 | 0.0045458 | 0.032081 | 0.776503686 | glucuronate interconversions |
| 5'-Methylthioadenosine | HMDB0001173 | 0.00042011 | 0.0062617 | 1.297978781 | Spermidine and Spermine Biosynthesis |
| D-Glutamic acid | HMDB0003339 | 0.0028889 | 0.023246 | 1.130394784 | glutamate metabolism |
| Vitamin K1 | HMDB0003555 | 0.00059622 | 0.0078976 | 1.402581452 | Vitamin K metabolism |
| 7-Methylinosine | HMDB0003950 | 3.3366E-07 | 0.00004104 | 0.672691656 |  |
| Indolylacryloylglycine | HMDB0006005 | 0.0037136 | 0.027564 | 1.252967002 | Tryptophan Metabolism |
| Phenylacetylglutamine | HMDB0006344 | 0.0024939 | 0.021335 | 1.129881225 | Phenylacetate Metabolism |
| Indoxyl glucuronide | HMDB0010319 | 0.0092096 | 0.049559 | 0.772589186 | glucuronate interconversions |
| Dopamine glucuronide | HMDB0010329 | 0.00010918 | 0.0027649 | 0.7729056 | glucuronate interconversions |
| 11-Oxo-androsterone glucuronide | HMDB0010338 | 0.0082546 | 0.047068 | 1.383504965 | glucuronate interconversions |
| 11-beta-Hydroxyandrosterone-3-glucuronide | HMDB0010351 | 0.00016528 | 0.0033882 | 1.926137404 | glucuronate interconversions |
| LysoPC(20:4(8Z,11Z,14Z,17Z)) | HMDB0010396 | 0.000006928 | 0.00049709 | 1.575395439 | Glycerophospholipid metabolism |
| Dopamine quinone | HMDB0012219 | 0.0034924 | 0.026377 | 1.085581908 | Catecholamine Biosynthesis |
| N-acetyltryptophan | HMDB0013713 | 0.000097419 | 0.0027057 | 1.461267557 | Tryptophan Metabolism |
| Alanyl-Histidine | HMDB0028689 | 0.0030328 | 0.023903 | 0.780701086 |  |
| Leucyl-Hydroxyproline | HMDB0028930 | 8.6702E-06 | 0.00057424 | 0.823095679 | Arginine and Proline Metabolism |
| Methionyl-Glutamate | HMDB0028972 | 0.00098125 | 0.011573 | 1.482918496 | glutamate metabolism |
| Phenylalanyl-Serine | HMDB0029004 | 0.00052545 | 0.0073843 | 1.132262297 | Phenylacetate Metabolism |
| Phenylalanyl-Valine | HMDB0029008 | 0.0041664 | 0.030145 | 0.800474965 | Phenylacetate Metabolism |
| Prolyl-Lysine | HMDB0029022 | 0.000055994 | 0.0019372 | 0.581388063 |  |
| Tryptophyl-Threonine | HMDB0029093 | 0.0076036 | 0.044516 | 0.732891649 | Tryptophan Metabolism |
| Tyrosyl-Hydroxyproline | HMDB0029106 | 5.3585E-06 | 0.00047319 | 0.761802515 | Arginine and Proline Metabolism |
| (9Z,11E,13E,15Z)-4-Oxo-9,11,13,15-octadecatetraenoic acid | HMDB0031098 | 0.00055539 | 0.0075903 | 1.182201539 | Fatty acid metabolism |
| Litcubine | HMDB0032110 | 0.000096991 | 0.0027057 | 0.621986977 |  |
| N2-Galacturonyl-L-lysine | HMDB0033105 | 0.0092096 | 0.049559 | 0.801771378 |  |
| S-Allylcysteine | HMDB0034323 | 0.0085716 | 0.048236 | 0.615030788 |  |
| 4-Hydroxy-3-methoxy-cinnamoylglycine | HMDB0059747 | 0.0021876 | 0.01962 | 1.333725777 | Glycine metabolism |
| 6-amino-5[N-methylformylamino]-1-methyluracil | HMDB0059771 | 0.0015521 | 0.015596 | 1.585837231 |  |
| Dihyroxy-1H-indole glucuronide I | HMDB0059997 | 0.0055435 | 0.037582 | 1.361224212 | glucuronate interconversions |
| L-Formylkynurenine | HMDB0060485 | 0.00042181 | 0.0062617 | 0.83593851 | Tryptophan Metabolism |
| N-Arachidonoyl GABA | HMDB0062330 | 0.00088201 | 0.010696 | 1.363669246 |  |

Table S3 Gender differential metabolites in adults population

| Description | ID | Raw p-value | P.value adjusted | FC | Pathway |
| --- | --- | --- | --- | --- | --- |
| Deoxyuridine | HMDB0000012 | 5.9911E-11 | 1.7194E-09 | 1.949 |  |
| Deoxyinosine | HMDB0000071 | 0.0016344 | 0.0051547 | 0.81245 | Purine Metabolism |
| Dopamine | HMDB0000073 | 1.6384E-07 | 2.0153E-06 | 1.293 | Catecholamine Biosynthesis |
| Guanidoacetic acid | HMDB0000128 | 3.0057E-20 | 6.4698E-18 | 1.9334 | Arginine and Proline Metabolism |
| Pantothenic acid | HMDB0000210 | 4.5392E-14 | 2.388E-12 | 1.4803 | Vitamin metabolism |
| Riboflavin | HMDB0000244 | 0.000051498 | 0.00027887 | 0.69267 | Vitamin metabolism |
| 3-Hydroxytetradecanedioic acid | HMDB0000394 | 5.8926E-11 | 1.7194E-09 | 0.53209 | Fatty acid metabolism |
| 2-Furoylglycine | HMDB0000439 | 7.1348E-07 | 7.3132E-06 | 0.6546 | Glycine metabolism |
| L-Glutamine | HMDB0000641 | 1.0364E-06 | 0.000009915 | 1.1808 | glutamate metabolism |
| Decanoylcarnitine | HMDB0000651 | 1.2685E-07 | 1.6062E-06 | 0.59602 | Fatty acid metabolism |
| Ortho-Hydroxyphenylacetic acid | HMDB0000669 | 4.4923E-07 | 4.9588E-06 | 0.8186 | Phenylacetate Metabolism |
| Aspartylphenylalanine | HMDB0000706 | 2.2122E-07 | 2.5907E-06 | 0.76599 | Phenylalanine metabolism |
| Indoleacrylic acid | HMDB0000734 | 0.000047815 | 0.00026733 | 1.3365 | Tryptophan Metabolism |
| 5-Hydroxyindoleacetic acid | HMDB0000763 | 0.00020875 | 0.00095099 | 1.9654 | Tryptophan Metabolism |
| N-Acetyl-9-O-lactoylneuraminic acid | HMDB0000768 | 0.00022027 | 0.00098776 | 1.6276 | #N/A |
| Oxypurinol | HMDB0000786 | 7.6516E-06 | 0.000054 | 1.6739 | Purine Metabolism |
| L-Octanoylcarnitine | HMDB0000791 | 7.3355E-13 | 3.1579E-11 | 0.63108 | Fatty acid metabolism |
| S-Adenosylhomocysteine | HMDB0000939 | 2.213E-13 | 1.0311E-11 | 0.71788 | #N/A |
| Cotinine glucuronide | HMDB0001013 | 4.0597E-10 | 9.4471E-09 | 0.66107 | glucuronate interconversions |
| Cotinine glucuronide | HMDB0001013 | 4.0597E-10 | 9.4471E-09 | 0.66107 | nicotine metabolism |
| Cotinine | HMDB0001046 | 2.5654E-16 | 2.2088E-14 | 0.071471 | nicotine metabolism |
| 5'-Methylthioadenosine | HMDB0001173 | 5.6126E-10 | 1.2391E-08 | 1.5379 | Spermidine and Spermine Biosynthesis |
| Nicotine glucuronide | HMDB0001272 | 0.0012862 | 0.0042757 | 0.75276 | glucuronate interconversions |
| Nicotine glucuronide | HMDB0001272 | 0.0012862 | 0.0042757 | 0.75276 | nicotine metabolism |
| Hydroxycotinine | HMDB0001390 | 1.9022E-16 | 1.8198E-14 | 0.059945 | nicotine metabolism |
| Niacinamide | HMDB0001406 | 0.000001452 | 0.000013242 | 0.79356 | Nicotinate and nicotinamide metabolism |
| Homolanthionine | HMDB0002034 | 0.00029431 | 0.0012544 | 0.77042 | #N/A |
| Glycylprolylhydroxyproline | HMDB0002171 | 0.000015092 | 0.000099953 | 0.4709 | proline metabolism |
| N-Acetylcadaverine | HMDB0002284 | 0.00043364 | 0.0016818 | 0.67225 | #N/A |
| Glycochenodeoxycholic acid 3-glucuronide | HMDB0002579 | 0.0059422 | 0.015694 | 0.7732 | Bile Acid Biosynthesis |
| Prostaglandin F1a | HMDB0002685 | 0.00033156 | 0.0013926 | 0.66379 | Steroid hormone biosynthesis |
| Testosterone glucuronide | HMDB0003193 | 1.0773E-21 | 4.638E-19 | 0.56992 | Steroid hormone biosynthesis |
| D-Glutamine | HMDB0003423 | 6.8519E-06 | 0.000049163 | 1.3279 | #N/A |
| Vitamin K1 | HMDB0003555 | 0.00063563 | 0.0023388 | 1.4679 | Vitamin metabolism |
| 21-Deoxycortisol | HMDB0004030 | 0.00007055 | 0.00036783 | 26.797 | Steroid hormone biosynthesis |
| 5-Methoxyindoleacetate | HMDB0004096 | 0.000008639 | 0.000060473 | 0.85677 | #N/A |
| Biotin sulfone | HMDB0004818 | 0.0019423 | 0.0059724 | 0.79526 | Vitamin metabolism |
| Thromboxane B3 | HMDB0005099 | 0.000022041 | 0.00013852 | 1.4948 | #N/A |
| Indolylacryloylglycine | HMDB0006005 | 0.00096846 | 0.0033354 | 1.2932 | Tryptophan Metabolism |
| 2,6 Dimethylheptanoyl carnitine | HMDB0006320 | 3.9378E-06 | 0.000030822 | 0.76125 | #N/A |
| Tyramine-O-sulfate | HMDB0006409 | 0.00035937 | 0.0014876 | 0.67191 | #N/A |
| Cortolone-3-glucuronide | HMDB0010320 | 0.000045824 | 0.00025787 | 0.80992 | Steroid hormone biosynthesis |
| Dopamine glucuronide | HMDB0010329 | 4.715E-14 | 2.388E-12 | 0.70424 | glucuronate interconversions |
| 11-beta-Hydroxyandrosterone-3-glucuronide | HMDB0010351 | 9.6627E-11 | 2.5838E-09 | 1.8655 | glucuronate interconversions |
| LysoPC(20:4(8Z,11Z,14Z,17Z)) | HMDB0010396 | 0.0015076 | 0.0048798 | 1.6832 | Glycerophospholipid metabolism |
| gamma-Glutamylvaline | HMDB0011172 | 5.945E-09 | 9.6578E-08 | 0.80583 | glutamate metabolism |
| Cinnamoylglycine | HMDB0011621 | 0.00040236 | 0.0015891 | 1.8029 | Glycine metabolism |
| N-Succinyl-L,L-2,6-diaminopimelate | HMDB0012267 | 3.1173E-08 | 4.5491E-07 | 0.64067 | #N/A |
| Dynorphin B (10-13) | HMDB0012936 | 1.8703E-06 | 0.000016266 | 25.077 | #N/A |
| Kinetensin 1-3 | HMDB0012983 | 0.000020856 | 0.00013204 | 1.3798 | #N/A |
| N-acetyltryptophan | HMDB0013713 | 2.2567E-07 | 2.5907E-06 | 1.823 | Tryptophan Metabolism |
| Arginyl-Isoleucine | HMDB0028712 | 0.000040312 | 0.00023452 | 1.3861 | #N/A |
| Asparaginyl-Lysine | HMDB0028736 | 1.1157E-14 | 7.3891E-13 | 0.5879 | Lysine metabolism |
| Asparaginyl-Proline | HMDB0028739 | 1.0349E-07 | 1.3686E-06 | 0.74739 | Arginine and Proline Metabolism |
| Glutaminyllysine | HMDB0028802 | 7.5196E-06 | 0.000053507 | 0.66848 | Lysine metabolism |
| Glutamyltryptophan | HMDB0028830 | 4.6704E-14 | 2.388E-12 | 0.42276 | Tryptophan Metabolism |
| Histidinyl-Arginine | HMDB0028879 | 1.6132E-06 | 0.000014319 | 0.53534 | Histidine metabolism |
| Histidinyl-Asparagine | HMDB0028880 | 0.00013705 | 0.00066665 | 0.80225 | Histidine metabolism |
| Histidinyl-Histidine | HMDB0028887 | 0.000024338 | 0.00014862 | 0.79699 | Histidine metabolism |
| Histidinyl-Isoleucine | HMDB0028888 | 0.000023548 | 0.00014482 | 0.67896 | Histidine metabolism |
| Isoleucyl-Isoleucine | HMDB0028910 | 0.00014408 | 0.00069304 | 0.72489 | #N/A |
| Leucyl-Hydroxyproline | HMDB0028930 | 3.1706E-12 | 1.3E-10 | 0.62129 | Arginine and Proline Metabolism |
| Lysyl-Arginine | HMDB0028945 | 0.00089036 | 0.003129 | 1.2973 | Arginine and Proline Metabolism |
| Lysyl-Asparagine | HMDB0028946 | 8.4696E-07 | 0.000008382 | 0.64944 | #N/A |
| Methionyl-Glutamate | HMDB0028972 | 0.00091032 | 0.0031732 | 1.3661 | glutamate metabolism |
| Methionyl-Proline | HMDB0028981 | 1.7293E-09 | 3.384E-08 | 0.20299 | Arginine and Proline Metabolism |
| Phenylalanyl-Serine | HMDB0029004 | 0.00029011 | 0.0012427 | 1.4494 | Phenylalanine metabolism |
| Phenylalanyl-Valine | HMDB0029008 | 0.0013314 | 0.0044088 | 0.77652 | Phenylalanine metabolism |
| Serylproline | HMDB0029047 | 0.000043678 | 0.00025071 | 0.75445 | Arginine and Proline Metabolism |
| Threoninyl-Hydroxyproline | HMDB0029062 | 0.0001081 | 0.00054432 | 0.74446 | Arginine and Proline Metabolism |
| Tyrosyl-Valine | HMDB0029118 | 1.9495E-07 | 2.3642E-06 | 0.81279 | #N/A |
| Urolithin A-3-O-glucuronide | HMDB0029222 | 0.0011846 | 0.0039685 | 2.1102 | #N/A |
| (9Z,11E,13E,15Z)-4-Oxo-9,11,13,15-octadecatetraenoic acid | HMDB0031098 | 0.0017051 | 0.0052998 | 1.5024 | Fatty acid metabolism |
| Phenylmethylglycidic ester | HMDB0031729 | 1.3477E-06 | 0.000012613 | 4.5577 | #N/A |
| N-Acetylhistidine | HMDB0032055 | 0.0018941 | 0.0058452 | 1.4445 | Histidine metabolism |
| N1,N10-Dicoumaroylspermidine | HMDB0033469 | 0.000081567 | 0.00041556 | 0.82667 | Spermidine and Spermine Biosynthesis |
| N-(1-Deoxy-1-fructosyl)tryptophan | HMDB0037847 | 5.5945E-07 | 5.9467E-06 | 0.70358 | Tryptophan Metabolism |
| N-Carboxyacetyl-D-phenylalanine | HMDB0039102 | 8.0685E-20 | 1.3894E-17 | 0.41043 |  |
| (E)-10-Hydroxy-8-decenoic acid | HMDB0039533 | 6.1994E-07 | 6.5093E-06 | 0.79691 | Fatty acid metabolism |
| N-(1-Deoxy-1-fructosyl)isoleucine | HMDB0039780 | 0.000019406 | 0.00012376 | 0.73174 |  |
| 13-Hydroxy-9-methoxy-10-oxo-11-octadecenoic acid | HMDB0040901 | 2.4924E-06 | 0.000020634 | 0.78844 | #N/A |
| Isonicotinylglycine | HMDB0041912 | 5.1285E-08 | 7.2387E-07 | 0.83964 | Glycine metabolism |
| N-Phenylacetylglutamic acid | HMDB0059772 | 1.2648E-08 | 0.000000198 | 0.66982 | glutamate metabolism |
| 10Z-Heptadecenoic acid | HMDB0060038 | 0.00029999 | 0.0012724 | 0.84528 | Fatty acid metabolism |
| 9-Hydroxy-10-O-D-glucuronoside-12Z-octadecenoate | HMDB0060121 | 0.00066516 | 0.0024165 | 0.81363 | Fatty acid metabolism |
| 8-Methoxykynurenate | HMDB0060426 | 0.00052688 | 0.0019896 | 0.80854 | Tryptophan Metabolism |
| gamma-Glutamyl-beta-cyanoalanine | HMDB0060478 | 0.018477 | 0.041975 | 1.5317 | glutamate metabolism |
| L-Formylkynurenine | HMDB0060485 | 1.4721E-09 | 2.9477E-08 | 0.53083 | Tryptophan Metabolism |
| 7-hydroxygranisetron | HMDB0061062 | 4.8186E-06 | 0.000036715 | 0.61894 | #N/A |
| Dihydroartemisinin (DHA) | HMDB0061088 | 2.7297E-06 | 0.000022383 | 0.78915 |  |
| 3-hydroxydodecanoyl carnitine | HMDB0061638 | 0.000070184 | 0.00036783 | 0.76384 | Fatty acid metabolism |
| 3,4,5,6-Tetrahydrohippuric acid | HMDB0061679 | 7.8039E-11 | 2.1675E-09 | 0.21213 | Hippuric acid metabolism |
| 1-Oleoylglycerophosphoserine | HMDB0061694 | 8.111E-10 | 1.7033E-08 | 0.47177 | Glycerophospholipid metabolism |
| N-Arachidonoyl GABA | HMDB0062330 | 2.227E-07 | 2.5907E-06 | 1.8937 | 0 |
| hydroxyisovaleroyl carnitine | HMDB0062555 | 1.6949E-06 | 0.000014891 | 0.80782 | Fatty acid metabolism |
| (7R)-7-hydroxyoctanoic Acid | HMDB0062596 | 4.5164E-11 | 1.3888E-09 | 0.80307 | Fatty acid metabolism |
| (R)-3-hydroxybutyrylcarnitine | HMDB0062735 | 0.000086324 | 0.00043721 | 0.72113 | Fatty acid metabolism |
| 4-Hepteneoylglycine | HMDB0094730 | 5.3269E-06 | 0.000039882 | 2.6238 | Glycine metabolism |

Table S4 Gender and age dependent metabolism pathways

| **Gender-dependent metabolism pathways** | |
| --- | --- |
| **Factors** | **Differential metabolism pathways** |
| 1-6 | Vitamin k metabolism |
| 7-12 | Riboflavin metabolism, Steroidogenesis，Arginine and proline metabolism, glycine and serine metabolism |
| 13-18 | Riboflavin metabolism, Androgen and estrogen metabolism，Pantothenate and CoA biosynthesis, caffeine metabolism, Arginine and proline metabolism, Pterine biosynthesis, urea cycle |
| 20-30 | Methylhistine metabolism, Vitamine B6 metabolism, Biotin metabolism, Phosphatidylcholine biosynthesis, Ammonia recycling, Alanine metabolism, Nicotinate and nicotinamide metabolism，Vitamin k metabolism, Spermidine and spermine biosythesis, Pterine biosynthesis |
| 31-50 | Riboflavin metabolism, Beta-oxidation of short chain fatty acids，Spermidine and spermine biosythesis, Pantothenate and CoA biosynthesis, Pterine biosynthesis, beta-alanine metabolism |
| >50 | Beta-oxidation of short chain fatty acids, Androgen and estrogen metabolism，Vitamin k metabolism, Pterine biosynthesis, Arginine and proline metabolism |
| **Age-dependent metabolism pathways** | |
| Age-boys | Tryptophan metabolism, Histidine metabolism, Riboflavin metabolism, Pantothenate and CoA biosynthesis, Alanine metabolism, Fatty acid biosynthesis |
| Age-girls | Histidine metabolism，Purine metabolism，Steroid hormone biosynthesis，Riboflavin metabolism，Pantothenate and CoA biosynthesis, Fatty acid biosynthesis |
| Age-males | Steroid hormone biosynthesis, Riboflavin metabolism, Tryptophan metabolism, Pantothenate and CoA biosynthesis, Amino acid metabolism, Purine metabolism, Pyrimidine metabolism |
| Age-females | Purine metabolism, Steroid hormone biosynthesis, Caffeine metabolism, Pyrimidine metabolism, Pantothenate and CoA biosynthesis, Amino acid metabolism |

Table S5 Age differential metabolites in boys

| Compound | ID | VIP | Raw p.value | P-value adjusted |
| --- | --- | --- | --- | --- |
| 10-Hydroxy-octadec-12Z-enoate-9-beta-D-glucuronide | HMDB0060120 | 1.83762 | 4.84E-15 | 1.1906E-13 |
| 10Z-Heptadecenoic acid | HMDB0060038 | 2.26015 | 1.8146E-28 | 1.953E-26 |
| 11-beta-Hydroxyandrosterone-3-glucuronide | HMDB0010351 | 1.5088 | 2.0918E-10 | 2.1699E-09 |
| 11-Oxo-androsterone glucuronide | HMDB0010338 | 2.06964 | 9.115E-18 | 3.27E-16 |
| 12-Hydroxydodecanoic acid | HMDB0002059 | 1.03311 | 0.000088107 | 0.00027386 |
| 12-Hydroxyhexadecanoic acid | HMDB0112190 | 1.5886 | 3.5655E-08 | 2.3615E-07 |
| 12-Methyltridecanoic acid | HMDB0031072 | 1.30581 | 2.6268E-09 | 2.2617E-08 |
| 12-oxo-20-dihydroxy-leukotriene B4 | HMDB0012551 | 1.46376 | 0.026547 | 0.04476 |
| 14,15-DiHETrE | HMDB0002265 | 1.33567 | 0.00024928 | 0.00069236 |
| 1-Methylhistidine | HMDB0000001 | 1.59163 | 1.4388E-18 | 5.6311E-17 |
| 1-Oleoylglycerophosphoserine | HMDB0061694 | 1.36393 | 1.1443E-13 | 2.3458E-12 |
| 2-Amino-4-ethoxy-3-hydroxybutanoic acid | HMDB0032862 | 1.04644 | 0.000085252 | 0.00026595 |
| 2-Aminomuconic acid | HMDB0001241 | 1.06575 | 0.0013876 | 0.0032733 |
| 2-Furoylglycine | HMDB0000439 | 1.17766 | 0.000024384 | 0.000088212 |
| 2-octenoylglycine | HMDB0094801 | 1.21902 | 0.000012341 | 0.00004608 |
| 3,4,5,6-Tetrahydrohippuric acid | HMDB0061679 | 1.02523 | 6.5219E-06 | 0.00002674 |
| 3a,7b,12a-Trihydroxyoxocholanyl-Glycine | HMDB0000331 | 1.00857 | 0.023923 | 0.040869 |
| 3-alpha-hydroxy-5-alpha-androstane-17-one 3-D-glucuronide | HMDB0010365 | 3.07168 | 5.5E-43 | 4.7355E-40 |
| 3-Hydroxydodecanedioic acid | HMDB0000413 | 1.04132 | 1.0099E-15 | 2.8357E-14 |
| 3-hydroxydodecanoyl carnitine | HMDB0061638 | 1.18864 | 0.0057302 | 0.011609 |
| 3-Hydroxytetradecanedioic acid | HMDB0000394 | 1.35272 | 8.6761E-16 | 2.5759E-14 |
| 3-Methoxytyrosine | HMDB0001434 | 1.02954 | 4.1996E-06 | 0.000018638 |
| 4-Hepteneoylglycine | HMDB0094730 | 1.15123 | 1.4833E-08 | 1.0732E-07 |
| 5-Hydroxyindoleacetic acid | HMDB0000763 | 1.05159 | 0.00013506 | 0.00040802 |
| 5-Methylcytidine | HMDB0000982 | 1.9013 | 2.8118E-09 | 2.3735E-08 |
| 5'-Methylthioadenosine | HMDB0001173 | 1.03135 | 0.000041448 | 0.00014105 |
| 5Z-Dodecenoic acid | HMDB0000529 | 1.17921 | 2.4877E-08 | 1.6999E-07 |
| 6-octenoylglycine | HMDB0094805 | 1.03805 | 0.00022408 | 0.00062844 |
| 7-Aminomethyl-7-carbaguanine | HMDB0011690 | 1.52211 | 1.681E-09 | 1.4921E-08 |
| 7-hydroxygranisetron | HMDB0061062 | 1.09752 | 8.9435E-06 | 0.000035161 |
| 7Z,10Z-Hexadecadienoic acid | HMDB0000477 | 1.27628 | 2.2169E-07 | 1.2236E-06 |
| 8-Hydroxy-5,6-octadienoic acid | HMDB0031101 | 1.20208 | 9.4714E-08 | 5.7027E-07 |
| 8-Hydroxy-7-methylguanine | HMDB0006037 | 1.08802 | 5.4212E-06 | 0.000022881 |
| 8-Methoxykynurenate | HMDB0060426 | 1.53238 | 2.9697E-06 | 0.000013601 |
| 9-Hydroxy-10-O-D-glucuronoside-12Z-octadecenoate | HMDB0060121 | 1.6162 | 1.2387E-12 | 2.2219E-11 |
| 9-peroxy-5Z,7E,11Z,14Z-eicosatetraenoate | HMDB0060098 | 1.14289 | 0.0015792 | 0.0036849 |
| alpha-CEHC glucuronide | HMDB0062445 | 1.17026 | 1.7382E-08 | 1.2167E-07 |
| Androstenedione | HMDB0000053 | 1.50982 | 3.319E-07 | 0.000001764 |
| Androstenol | HMDB0005935 | 2.08427 | 1.2664E-31 | 2.1808E-29 |
| Asparaginyl-Lysine | HMDB0028736 | 1.63496 | 1.1422E-21 | 7.3661E-20 |
| Beta-Citryl-L-glutamic acid | HMDB0013220 | 1.34012 | 4.7718E-11 | 6.0419E-10 |
| Cotinine | HMDB0001046 | 1.68957 | 7.8077E-07 | 3.8635E-06 |
| Cotinine glucuronide | HMDB0001013 | 1.17367 | 0.000010621 | 0.000040463 |
| Cytosine | HMDB0000630 | 1.83326 | 6.8114E-11 | 8.26E-10 |
| Deoxyuridine | HMDB0000012 | 1.25522 | 0.00067975 | 0.0017063 |
| Dihyroxy-1H-indole glucuronide I | HMDB0059997 | 1.168 | 0.000008481 | 0.000033964 |
| DL-Dopa | HMDB0000609 | 1.40935 | 0.00019339 | 0.00055504 |
| Dodecanoic acid | HMDB0000638 | 1.17673 | 4.7593E-07 | 2.4247E-06 |
| Dopamine glucuronide | HMDB0010329 | 1.49323 | 6.5033E-22 | 4.6661E-20 |
| Eicosapentaenoic acid | HMDB0001999 | 1.48613 | 2.9274E-12 | 4.7557E-11 |
| gamma-Glutamyl-beta-cyanoalanine | HMDB0060478 | 1.2691 | 0.020285 | 0.03557 |
| Glutamate, gamma-methyl ester | HMDB0061715 | 1.02066 | 0.0002545 | 0.00070458 |
| Glutamylisoleucine | HMDB0028822 | 1.09779 | 2.5291E-15 | 6.4262E-14 |
| Glycochenodeoxycholic acid 3-glucuronide | HMDB0002579 | 1.59991 | 3.134E-11 | 4.2831E-10 |
| Glycyl-Histidine | HMDB0028843 | 2.08443 | 5.3763E-11 | 6.7086E-10 |
| Histidinyl-Arginine | HMDB0028879 | 1.18299 | 0.0010671 | 0.0025592 |
| Histidinyl-Asparagine | HMDB0028880 | 1.14463 | 0.00001869 | 0.000068478 |
| Histidinyl-Histidine | HMDB0028887 | 1.12599 | 3.4594E-11 | 4.5824E-10 |
| Hydroxycotinine | HMDB0001390 | 2.1527 | 7.5805E-10 | 7.1723E-09 |
| Isoleucyl-Leucine | HMDB0028911 | 1.47108 | 2.1018E-06 | 9.8349E-06 |
| Kinetensin 1-3 | HMDB0012983 | 1.24301 | 8.9858E-08 | 5.4871E-07 |
| Kynuramine | HMDB0012246 | 1.43135 | 5.8681E-06 | 0.000024302 |
| L-Octanoylcarnitine | HMDB0000791 | 1.33 | 1.021E-15 | 2.8357E-14 |
| Lysyl-Asparagine | HMDB0028946 | 1.29517 | 6.9111E-13 | 1.266E-11 |
| Methionyl-Glutamate | HMDB0028972 | 1.02282 | 0.00015888 | 0.00047498 |
| N1,N10-Dicoumaroylspermidine | HMDB0033469 | 1.90388 | 1.2594E-14 | 2.9306E-13 |
| N-Acetyl-9-O-lactoylneuraminic acid | HMDB0000768 | 1.35408 | 9.9726E-06 | 0.000038504 |
| N-Acetylaspartylglutamic acid | HMDB0001067 | 2.45464 | 1.2075E-16 | 3.8506E-15 |
| N-Acetylhistidine | HMDB0032055 | 1.41169 | 7.3513E-11 | 8.6705E-10 |
| N-acetyltryptophan | HMDB0013713 | 1.3743 | 0.00046284 | 0.0012039 |
| NAPQI | HMDB0060946 | 1.35511 | 3.0133E-08 | 2.0429E-07 |
| Nicotine glucuronide | HMDB0001272 | 1.15856 | 3.638E-08 | 2.3911E-07 |
| N-Methylserotonin | HMDB0004369 | 1.5752 | 0.000012363 | 0.00004608 |
| N-Succinyl-L,L-2,6-diaminopimelate | HMDB0012267 | 1.52039 | 0.00078595 | 0.0019279 |
| Ortho-Hydroxyphenylacetic acid | HMDB0000669 | 1.30534 | 9.1085E-19 | 3.7345E-17 |
| Oxypurinol | HMDB0000786 | 1.96538 | 9.0519E-18 | 3.27E-16 |
| Pantothenic acid | HMDB0000210 | 1.68881 | 1.2139E-30 | 1.7419E-28 |
| Phenylalanyl-Serine | HMDB0029004 | 1.16889 | 9.9709E-06 | 0.000038504 |
| Phenylmethylglycidic ester | HMDB0031729 | 1.2105 | 2.1928E-08 | 1.5104E-07 |
| Prolyl-Histidine | HMDB0029019 | 1.41617 | 7.7156E-09 | 5.9314E-08 |
| Prolyl-Lysine | HMDB0029022 | 3.47662 | 0.0001833 | 0.00053137 |
| Prostaglandin F1a | HMDB0002685 | 1.26371 | 0.00050203 | 0.0012864 |
| Riboflavin | HMDB0000244 | 1.66616 | 1.1469E-09 | 1.0395E-08 |
| Serylmethionine | HMDB0029045 | 1.21992 | 4.569E-07 | 2.3463E-06 |
| Serylproline | HMDB0029047 | 1.3227 | 1.9059E-06 | 8.9673E-06 |
| Succinyladenosine | HMDB0000912 | 1.13645 | 2.7627E-23 | 2.1624E-21 |
| Testosterone glucuronide | HMDB0003193 | 2.60747 | 3.9103E-39 | 1.6834E-36 |
| Tetradecanedioic acid | HMDB0000872 | 1.21149 | 1.7632E-07 | 9.8579E-07 |
| Theobromine | HMDB0002825 | 2.0576 | 1.4417E-08 | 1.052E-07 |
| Threoninyl-Asparagine | HMDB0029056 | 1.13838 | 1.2422E-10 | 1.389E-09 |
| Threoninyl-Proline | HMDB0029069 | 1.51386 | 4.256E-14 | 9.396E-13 |
| Tryptophyl-Threonine | HMDB0029093 | 1.15239 | 0.00006214 | 0.00020114 |
| Tyramine-O-sulfate | HMDB0006409 | 1.17301 | 0.00020927 | 0.00059467 |
| Tyrosyl-Hydroxyproline | HMDB0029106 | 1.36858 | 1.1272E-19 | 4.8527E-18 |
| Tyrosyl-Isoleucine | HMDB0029108 | 1.09731 | 9.8293E-08 | 5.8771E-07 |
| Uric acid | HMDB0000289 | 1.32663 | 1.0148E-10 | 1.1497E-09 |
| Urocanic acid | HMDB0000301 | 1.90705 | 2.2177E-20 | 1.1934E-18 |
| Valyl-Proline | HMDB0029135 | 1.27558 | 0.00041336 | 0.001093 |

Table S6 Age differential metabolites in girls

| Compound | ID | VIP | Raw p.value | P-value adjusted |
| --- | --- | --- | --- | --- |
| 10-Hydroxy-octadec-12Z-enoate-9-beta-D-glucuronide | HMDB0060120 | 1.60914 | 1.8513E-08 | 3.6024E-07 |
| 10Z-Heptadecenoic acid | HMDB0060038 | 2.39228 | 1.3827E-11 | 4.7619E-10 |
| 11-beta-Hydroxyandrosterone-3-glucuronide | HMDB0010351 | 2.97832 | 2.3661E-12 | 9.7011E-11 |
| 11-Oxo-androsterone glucuronide | HMDB0010338 | 2.61005 | 3.6029E-15 | 2.5851E-13 |
| 12-Hydroxyhexadecanoic acid | HMDB0112190 | 1.48123 | 1.2547E-07 | 1.9478E-06 |
| 12-Methyltridecanoic acid | HMDB0031072 | 1.09854 | 0.00037271 | 0.0020056 |
| 18-Hydroxycortisol | HMDB0000418 | 1.02747 | 0.0010453 | 0.0046064 |
| 1-Methylhistidine | HMDB0000001 | 1.16109 | 0.000040572 | 0.00028077 |
| 1-Oleoylglycerophosphoserine | HMDB0061694 | 1.19824 | 7.6236E-06 | 0.000068374 |
| 21-Deoxycortisol | HMDB0004030 | 1.91262 | 0.0075737 | 0.02203 |
| 2-Amino-4-ethoxy-3-hydroxybutanoic acid | HMDB0032862 | 1.63016 | 0.0046924 | 0.015019 |
| 3,4-O-Dimethylgallic acid | HMDB0041662 | 1.07151 | 0.0061282 | 0.018294 |
| 3-alpha-hydroxy-5-alpha-androstane-17-one 3-D-glucuronide | HMDB0010365 | 3.18703 | 3.3365E-18 | 4.7878E-16 |
| 3-Hydroxytetradecanedioic acid | HMDB0000394 | 1.2878 | 0.000035271 | 0.00025307 |
| 3-Methoxytyrosine | HMDB0001434 | 1.89109 | 1.1758E-06 | 0.000013868 |
| 4-Hepteneoylglycine | HMDB0094730 | 1.10599 | 1.2425E-07 | 1.9478E-06 |
| 4-Pyridoxic acid | HMDB0000017 | 1.18179 | 0.013044 | 0.034136 |
| 5-Methoxytryptophan | HMDB0002339 | 1.27878 | 0.01423 | 0.03625 |
| 5'-Methylthioadenosine | HMDB0001173 | 1.39918 | 0.000034571 | 0.00025013 |
| 5Z-Dodecenoic acid | HMDB0000529 | 1.1343 | 2.3111E-06 | 0.000024266 |
| 7-Methylinosine | HMDB0003950 | 1.13161 | 0.017853 | 0.042213 |
| 8-Hydroxy-5,6-octadienoic acid | HMDB0031101 | 1.51476 | 0.0051912 | 0.01602 |
| 8-Hydroxy-7-methylguanine | HMDB0006037 | 1.10587 | 0.000029818 | 0.00022132 |
| 9-Hydroxy-10-O-D-glucuronoside-12Z-octadecenoate | HMDB0060121 | 1.33978 | 4.9577E-06 | 0.000046398 |
| alpha-CEHC glucuronide | HMDB0062445 | 1.43568 | 1.0988E-06 | 0.00001314 |
| Androstenedione | HMDB0000053 | 1.45314 | 0.000014246 | 0.0001191 |
| Androstenol | HMDB0005935 | 2.06736 | 6.0374E-18 | 7.426E-16 |
| Arginyl-Histidine | HMDB0028711 | 1.00018 | 0.00065604 | 0.0033423 |
| Arginyl-Proline | HMDB0028717 | 1.05334 | 0.000090549 | 0.00056907 |
| Asparaginyl-Lysine | HMDB0028736 | 1.41849 | 1.4162E-12 | 6.4177E-11 |
| Aspartylphenylalanine | HMDB0000706 | 1.18854 | 0.000040762 | 0.00028077 |
| Aspartyl-Valine | HMDB0028766 | 1.063 | 0.013112 | 0.034211 |
| Beta-Citryl-L-glutamic acid | HMDB0013220 | 1.6593 | 0.0014283 | 0.0058727 |
| Deoxyinosine | HMDB0000071 | 1.1994 | 0.0007458 | 0.0036485 |
| Dihyroxy-1H-indole glucuronide I | HMDB0059997 | 1.36962 | 6.073E-09 | 1.4132E-07 |
| Diphthamide | HMDB0060473 | 1.29704 | 0.012893 | 0.033948 |
| Dodecanoic acid | HMDB0000638 | 1.18643 | 0.00018726 | 0.0010749 |
| Dopamine glucuronide | HMDB0010329 | 1.02192 | 0.000013132 | 0.00011325 |
| Glutamate, gamma-methyl ester | HMDB0061715 | 1.59439 | 0.0050013 | 0.015716 |
| Glutamylisoleucine | HMDB0028822 | 1.05414 | 1.6456E-12 | 7.0843E-11 |
| Glycochenodeoxycholic acid 3-glucuronide | HMDB0002579 | 1.54222 | 1.108E-11 | 4.0989E-10 |
| Glycylprolylhydroxyproline | HMDB0002171 | 1.93795 | 0.000005065 | 0.000046892 |
| Guanine | HMDB0000132 | 1.54704 | 1.8828E-08 | 3.6024E-07 |
| Histidinyl-Asparagine | HMDB0028880 | 1.41162 | 1.7823E-06 | 0.000019182 |
| Histidinyl-Histidine | HMDB0028887 | 1.14755 | 5.0887E-11 | 1.4605E-09 |
| Kynuramine | HMDB0012246 | 1.59884 | 0.005122 | 0.015921 |
| Leucyl-Hydroxyproline | HMDB0028930 | 1.35912 | 2.2557E-07 | 3.3486E-06 |
| L-Octanoylcarnitine | HMDB0000791 | 1.46439 | 2.5628E-07 | 0.00000374 |
| L-prolyl-L-proline | HMDB0011180 | 1.12994 | 0.014197 | 0.03625 |
| Lysyl-Asparagine | HMDB0028946 | 1.20734 | 8.6141E-13 | 4.3628E-11 |
| Methionyl-Glutamate | HMDB0028972 | 1.52222 | 2.3694E-06 | 0.000024579 |
| N1,N10-Dicoumaroylspermidine | HMDB0033469 | 1.73211 | 2.3074E-09 | 5.6761E-08 |
| N2,N2-Dimethylguanosine | HMDB0004824 | 1.14419 | 0.00059672 | 0.0031138 |
| N-Acetyl-9-O-lactoylneuraminic acid | HMDB0000768 | 1.17607 | 0.000044645 | 0.0002994 |
| N-Acetylaspartylglutamic acid | HMDB0001067 | 2.10141 | 0.0052314 | 0.016087 |
| N-Acetylhistidine | HMDB0032055 | 1.84236 | 0.000096347 | 0.0005968 |
| NAPQI | HMDB0060946 | 1.1814 | 1.6278E-08 | 3.3371E-07 |
| Niacinamide | HMDB0001406 | 1.21 | 0.00082676 | 0.0038675 |
| Nicotine glucuronide | HMDB0001272 | 1.04692 | 0.00066969 | 0.0033918 |
| Ortho-Hydroxyphenylacetic acid | HMDB0000669 | 1.43558 | 2.6968E-11 | 8.2925E-10 |
| Oxypurinol | HMDB0000786 | 1.29738 | 0.000094858 | 0.00059183 |
| Pantothenic acid | HMDB0000210 | 1.28721 | 1.8378E-11 | 6.086E-10 |
| Phenylalanyl-Gamma-glutamate | HMDB0029009 | 1.28121 | 3.9878E-15 | 2.6411E-13 |
| Pivaloylcarnitine | HMDB0041993 | 1.01361 | 0.013907 | 0.035851 |
| Prostaglandin B2 | HMDB0004236 | 1.09062 | 0.0076578 | 0.0222 |
| Riboflavin | HMDB0000244 | 1.31822 | 0.0005718 | 0.0030019 |
| Serylproline | HMDB0029047 | 1.72547 | 0.01063 | 0.029019 |
| Succinyladenosine | HMDB0000912 | 1.12975 | 8.9784E-18 | 9.574E-16 |
| Testosterone glucuronide | HMDB0003193 | 2.63919 | 7.1437E-17 | 5.5916E-15 |
| Tetradecanedioic acid | HMDB0000872 | 1.10707 | 0.0096715 | 0.026876 |
| Threoninyl-Asparagine | HMDB0029056 | 1.2968 | 1.229E-10 | 3.4134E-09 |
| Threoninyl-Proline | HMDB0029069 | 1.74715 | 0.0010133 | 0.0044971 |
| Tyrosyl-Hydroxyproline | HMDB0029106 | 2.49219 | 1.2567E-20 | 3.6066E-18 |
| Uric acid | HMDB0000289 | 1.14038 | 0.010646 | 0.029019 |
| Urocanic acid | HMDB0000301 | 2.9307 | 1.0008E-17 | 9.574E-16 |
| Vitamin K1 | HMDB0003555 | 1.09069 | 0.000041184 | 0.00028142 |

Table S7 Age differential metabolites in males

| Compound | ID | VIP | Raw p.value | P-value adjusted |
| --- | --- | --- | --- | --- |
| 10Z-Heptadecenoic acid | HMDB0060038 | 1.54202 | 3.5651E-09 | 5.116E-07 |
| 11-peroxy-5Z,8Z,12E,14Z-eicosatetraenoate | HMDB0060099 | 1.29494 | 5.3464E-06 | 0.00011227 |
| 14,15-DiHETrE | HMDB0002265 | 1.32913 | 0.00077613 | 0.0064255 |
| 1-Oleoylglycerophosphoserine | HMDB0061694 | 1.32928 | 0.00080317 | 0.006586 |
| 20-Hydroxy-PGF2a | HMDB0004049 | 1.48833 | 0.0019303 | 0.01319 |
| 2-Aminomuconic acid | HMDB0001241 | 1.26575 | 0.0017131 | 0.01209 |
| 2-Aminonicotinic acid | HMDB0061680 | 1.27525 | 2.5604E-07 | 8.9768E-06 |
| 2-Hydroxymyristic acid | HMDB0002261 | 1.00773 | 0.0009378 | 0.0076174 |
| 3,4,5,6-Tetrahydrohippuric acid | HMDB0061679 | 1.90544 | 0.012937 | 0.047805 |
| 3,4-O-Dimethylgallic acid | HMDB0041662 | 1.70162 | 0.011865 | 0.044805 |
| 5'-Methylthioadenosine | HMDB0001173 | 1.75911 | 0.000014975 | 0.00025787 |
| 7Z,10Z-Hexadecadienoic acid | HMDB0000477 | 1.87876 | 1.2515E-11 | 3.5918E-09 |
| 9-Hydroxy-10-O-D-glucuronoside-12Z-octadecenoate | HMDB0060121 | 1.25573 | 0.0017409 | 0.012186 |
| 9-peroxy-5Z,7E,11Z,14Z-eicosatetraenoate | HMDB0060098 | 1.61574 | 0.0003453 | 0.0034977 |
| Androstenedione | HMDB0000053 | 1.67772 | 5.9596E-09 | 7.3303E-07 |
| Aspartyl-Valine | HMDB0028766 | 1.1079 | 0.0045664 | 0.02326 |
| Beta-Citryl-L-glutamic acid | HMDB0013220 | 1.51409 | 1.4011E-08 | 1.0967E-06 |
| Biotin | HMDB0000030 | 1.12538 | 0.0014069 | 0.010443 |
| Cinnamoylglycine | HMDB0011621 | 2.29269 | 1.1566E-11 | 3.5918E-09 |
| Cortisol | HMDB0000063 | 1.83153 | 1.3612E-06 | 0.000037807 |
| Deoxyuridine | HMDB0000012 | 1.50074 | 0.00018984 | 0.0021227 |
| Eicosapentaenoic acid | HMDB0001999 | 1.07988 | 0.00074825 | 0.0062944 |
| gamma-Glutamyl-beta-cyanoalanine | HMDB0060478 | 1.8481 | 1.1713E-07 | 5.6026E-06 |
| gamma-Glutamyltyrosine | HMDB0011741 | 1.17222 | 0.000012992 | 0.00023791 |
| Glutamate, gamma-methyl ester | HMDB0061715 | 1.33124 | 9.4014E-07 | 0.000028909 |
| Glutaminyllysine | HMDB0028802 | 1.19428 | 0.000050838 | 0.00072953 |
| Glutamylhistidine | HMDB0028821 | 1.24317 | 0.011296 | 0.044208 |
| Glycochenodeoxycholic acid 3-glucuronide | HMDB0002579 | 1.05943 | 0.0015392 | 0.011231 |
| Glycyl-Histidine | HMDB0028843 | 2.02387 | 0.0040866 | 0.021586 |
| Histidinyl-Histidine | HMDB0028887 | 1.30429 | 1.1836E-09 | 2.0382E-07 |
| Indoxyl glucuronide | HMDB0010319 | 1.11898 | 0.00067643 | 0.0058829 |
| L-Valine | HMDB0000883 | 1.04368 | 2.3807E-06 | 0.000056939 |
| Lysyl-Arginine | HMDB0028945 | 1.9517 | 0.011496 | 0.044585 |
| N2-Galacturonyl-L-lysine | HMDB0033105 | 1.24534 | 0.000010424 | 0.00019511 |
| N-Acetylhistidine | HMDB0032055 | 1.93211 | 0.0026674 | 0.01573 |
| N-Acetylisoleucine | HMDB0061684 | 1.0648 | 0.00055593 | 0.0051469 |
| N-acetyltryptophan | HMDB0013713 | 1.47853 | 0.0027848 | 0.016201 |
| N-Succinyl-L,L-2,6-diaminopimelate | HMDB0012267 | 1.93949 | 0.001554 | 0.011244 |
| o-Tyrosine | HMDB0006050 | 1.0896 | 5.0838E-08 | 2.9181E-06 |
| Oxypurinol | HMDB0000786 | 1.17605 | 0.0049745 | 0.024757 |
| Phenylalanyl-Valine | HMDB0029008 | 1.76184 | 0.0036131 | 0.019689 |
| Riboflavin | HMDB0000244 | 1.11409 | 0.011852 | 0.044805 |
| S-Allylcysteine | HMDB0034323 | 1.08572 | 0.00021125 | 0.0022455 |
| Serotonin | HMDB0000259 | 1.09989 | 0.00012109 | 0.001448 |
| Seryltryptophan | HMDB0029050 | 1.0387 | 0.010828 | 0.043567 |
| Testosterone glucuronide | HMDB0003193 | 1.34185 | 8.3695E-08 | 4.2389E-06 |
| Tetradecanedioic acid | HMDB0000872 | 1.03244 | 0.00045793 | 0.0043808 |
| Threoninyl-Asparagine | HMDB0029056 | 1.56338 | 0.000010145 | 0.0001941 |
| Threoninyl-Hydroxyproline | HMDB0029062 | 1.38739 | 6.4907E-06 | 0.00013219 |
| Thromboxane B3 | HMDB0005099 | 1.42125 | 0.012 | 0.045119 |
| Tyrosyl-Hydroxyproline | HMDB0029106 | 1.15734 | 8.7478E-06 | 0.00017118 |
| Tyrosyl-Serine | HMDB0029114 | 1.50606 | 0.00066384 | 0.0058345 |
| Uric acid | HMDB0000289 | 1.69896 | 1.0397E-08 | 9.9469E-07 |
| Valyl-Hydroxyproline | HMDB0029128 | 1.79775 | 0.0015712 | 0.011273 |
| Vitamin K1 | HMDB0003555 | 1.49503 | 1.9289E-06 | 0.000048846 |

Table S8 Age differential metabolites in females

| Compound | ID | VIP | Raw p.value | P-value adjusted |
| --- | --- | --- | --- | --- |
| 1,9-Dimethyluric acid | HMDB0002026 | 1.33595 | 0.0064524 | 0.015475 |
| 10-Hydroxy-octadec-12Z-enoate-9-beta-D-glucuronide | HMDB0060120 | 1.2924 | 0.014928 | 0.031121 |
| 10Z-Heptadecenoic acid | HMDB0060038 | 1.72352 | 4.6614E-15 | 1.3378E-12 |
| 11-beta-Hydroxyandrosterone-3-glucuronide | HMDB0010351 | 1.55479 | 2.4868E-10 | 1.7041E-08 |
| 11-peroxy-5Z,8Z,12E,14Z-eicosatetraenoate | HMDB0060099 | 1.49672 | 3.0234E-09 | 1.1858E-07 |
| 13-Hydroxy-9-methoxy-10-oxo-11-octadecenoic acid | HMDB0040901 | 1.57242 | 1.0569E-07 | 1.8572E-06 |
| 14,15-DiHETrE | HMDB0002265 | 1.60115 | 1.6245E-07 | 2.6391E-06 |
| 1-Oleoylglycerophosphoserine | HMDB0061694 | 1.41929 | 0.00026046 | 0.0010382 |
| 2,6 Dimethylheptanoyl carnitine | HMDB0006320 | 1.05379 | 0.000038205 | 0.0002136 |
| 2-Aminomuconic acid | HMDB0001241 | 1.40544 | 3.5423E-06 | 0.000028504 |
| 2-Pyridylacetic acid | HMDB0060722 | 1.27167 | 0.000013353 | 0.000085797 |
| 3,4-O-Dimethylgallic acid | HMDB0041662 | 1.75963 | 2.6803E-07 | 3.5504E-06 |
| 3-alpha-hydroxy-5-alpha-androstane-17-one 3-D-glucuronide | HMDB0010365 | 1.61379 | 9.2187E-12 | 9.9216E-10 |
| 3-Hydroxydodecanedioic acid | HMDB0000413 | 1.08245 | 0.00037419 | 0.0014041 |
| 3-hydroxydodecanoyl carnitine | HMDB0061638 | 1.43275 | 0.0002037 | 0.00085371 |
| 3-hydroxyoctanoyl carnitine | HMDB0061634 | 1.03868 | 0.0083347 | 0.019343 |
| 3-Hydroxysebacic acid | HMDB0000350 | 1.04312 | 0.000088792 | 0.00042976 |
| 3-Methylxanthine | HMDB0001886 | 1.29181 | 0.0093856 | 0.021266 |
| 4-Methoxyestrone | HMDB0060088 | 1.34353 | 5.0113E-08 | 1.0034E-06 |
| 5-Methoxytryptophan | HMDB0002339 | 1.26866 | 9.7402E-07 | 9.9837E-06 |
| 5-Methylcytidine | HMDB0000982 | 1.11194 | 3.1676E-09 | 1.1858E-07 |
| 5Z-Dodecenoic acid | HMDB0000529 | 1.25697 | 4.4756E-06 | 0.000034102 |
| 6-Carboxy-5,6,7,8-tetrahydropterin | HMDB0060410 | 1.00225 | 0.01476 | 0.030921 |
| 7-hydroxygranisetron | HMDB0061062 | 1.08022 | 0.010319 | 0.023199 |
| 7Z,10Z-Hexadecadienoic acid | HMDB0000477 | 1.82943 | 1.0085E-12 | 1.2524E-10 |
| 8-Hydroxy-7-methylguanine | HMDB0006037 | 1.83102 | 0.00077568 | 0.0025491 |
| 9-Hydroxy-10-O-D-glucuronoside-12Z-octadecenoate | HMDB0060121 | 1.41043 | 0.0058913 | 0.014534 |
| 9-Methyluric acid | HMDB0001973 | 1.60314 | 2.7645E-06 | 0.000023109 |
| 9-peroxy-5Z,7E,11Z,14Z-eicosatetraenoate | HMDB0060098 | 1.68396 | 6.7803E-07 | 7.3897E-06 |
| Androstenedione | HMDB0000053 | 1.57149 | 3.5986E-10 | 2.2132E-08 |
| Androstenol | HMDB0005935 | 1.89602 | 1.3018E-17 | 1.1208E-14 |
| Arginyl-Histidine | HMDB0028711 | 1.16679 | 0.0039176 | 0.010475 |
| Asparaginyl-Arginine | HMDB0028725 | 1.42727 | 9.1271E-07 | 0.000009468 |
| Chitobiose | HMDB0003556 | 1.24367 | 3.9855E-06 | 0.000031195 |
| Cinnamoylglycine | HMDB0011621 | 1.49402 | 9.8405E-08 | 1.8273E-06 |
| Cortexolone | HMDB0000015 | 1.06131 | 0.00030555 | 0.0011797 |
| Cytosine | HMDB0000630 | 1.28324 | 1.0586E-06 | 0.00001052 |
| Decanoylcarnitine | HMDB0000651 | 1.17106 | 9.5281E-06 | 0.000064596 |
| Deoxycholic acid glycine conjugate | HMDB0000631 | 1.1801 | 0.00006551 | 0.00033179 |
| Deoxyuridine | HMDB0000012 | 1.36128 | 1.0311E-06 | 0.000010444 |
| Dopaquinone | HMDB0001229 | 1.18675 | 0.024531 | 0.047412 |
| Eicosapentaenoic acid | HMDB0001999 | 1.26598 | 0.00032484 | 0.0012486 |
| Galactosylhydroxylysine | HMDB0000600 | 1.13068 | 4.5731E-08 | 9.6035E-07 |
| gamma-Glutamyltyrosine | HMDB0011741 | 1.76541 | 1.914E-11 | 1.8311E-09 |
| Glutamylisoleucine | HMDB0028822 | 1.18104 | 3.6616E-06 | 0.000028943 |
| Glutamyltryptophan | HMDB0028830 | 1.16588 | 0.023439 | 0.045555 |
| Glycochenodeoxycholic acid 3-glucuronide | HMDB0002579 | 1.61326 | 0.000001467 | 0.000014035 |
| Glycyl-Histidine | HMDB0028843 | 1.90598 | 0.0023326 | 0.0067169 |
| Guanine | HMDB0000132 | 1.15158 | 0.0043746 | 0.011345 |
| Histidinyl-Arginine | HMDB0028879 | 1.02379 | 0.0015226 | 0.0046489 |
| Indoxyl glucuronide | HMDB0010319 | 1.20521 | 0.0065308 | 0.01562 |
| Isoleucyl-Leucine | HMDB0028911 | 1.65579 | 4.0644E-06 | 0.000031527 |
| L-beta-aspartyl-L-phenylalanine | HMDB0011167 | 1.12223 | 0.015627 | 0.032501 |
| L-Cystine | HMDB0000192 | 1.10355 | 1.6466E-06 | 0.00001541 |
| L-Valine | HMDB0000883 | 1.123 | 3.3608E-08 | 7.9934E-07 |
| Methionyl-Isoleucine | HMDB0028976 | 1.32286 | 0.000000304 | 3.9066E-06 |
| N1,N10-Dicoumaroylspermidine | HMDB0033469 | 1.19304 | 0.01193 | 0.026269 |
| N2-Galacturonyl-L-lysine | HMDB0033105 | 1.25299 | 4.2679E-06 | 0.00003281 |
| N-Acetylaspartylglutamic acid | HMDB0001067 | 1.15944 | 0.0020605 | 0.0060138 |
| N-Acetylproline | HMDB0094701 | 1.01575 | 0.000030414 | 0.00017814 |
| NAPQI | HMDB0060946 | 1.00978 | 0.013535 | 0.028845 |
| N-Carboxyacetyl-D-phenylalanine | HMDB0039102 | 1.18888 | 0.00018984 | 0.00080917 |
| Niacinamide | HMDB0001406 | 1.36932 | 0.000012946 | 0.000084445 |
| N-Succinyl-L,L-2,6-diaminopimelate | HMDB0012267 | 1.40124 | 0.024559 | 0.047412 |
| o-Tyrosine | HMDB0006050 | 1.24797 | 8.354E-07 | 8.7717E-06 |
| Oxypurinol | HMDB0000786 | 1.72428 | 1.6993E-08 | 4.8769E-07 |
| Prolyl-Lysine | HMDB0029022 | 2.17573 | 0.022339 | 0.043615 |
| Prostaglandin PGE2 glyceryl ester | HMDB0013045 | 1.19261 | 0.018354 | 0.037016 |
| S-aminomethyldihydrolipoamide | HMDB0006239 | 1.56247 | 0.021149 | 0.041861 |
| Serotonin | HMDB0000259 | 1.30467 | 0.000066843 | 0.0003346 |
| Serylmethionine | HMDB0029045 | 1.001 | 0.018358 | 0.037016 |
| Testosterone glucuronide | HMDB0003193 | 1.72493 | 1.0776E-15 | 4.6392E-13 |
| Threoninyl-Asparagine | HMDB0029056 | 1.13972 | 0.00025483 | 0.0010253 |
| Threoninyl-Hydroxyproline | HMDB0029062 | 1.25327 | 0.0002468 | 0.00099762 |
| Thromboxane B3 | HMDB0005099 | 1.14784 | 0.000056794 | 0.00029458 |
| Tyrosyl-Isoleucine | HMDB0029108 | 1.2371 | 0.00048232 | 0.0017303 |
| Tyrosyl-Serine | HMDB0029114 | 1.73527 | 2.2105E-07 | 3.1931E-06 |
| Tyrosyl-Valine | HMDB0029118 | 1.06509 | 1.9573E-07 | 3.0093E-06 |
| Uric acid | HMDB0000289 | 1.71719 | 4.2208E-09 | 1.4537E-07 |
| Vitamin K1 | HMDB0003555 | 1.22699 | 0.00071092 | 0.0023725 |
